# Supplementary material for: Highly effective synthesis of mercapto-functionalized cubic silsesquioxanes as the first step in designing advanced nano-delivery systems
Source: Royal Society of Chemistry journal article supplement (doi:10.1039/d3qi01838e), 2023-11-29
Supplement: d3qi01838e1.pdf [file d3qi01838e1.pdf]

*Supporting Information*

*for*

**Highly effective synthesis of mercapto-functionalized  
cubic silsesquioxanes as the first step in designing  
advanced nano delivery systems**

Kamil Hanek<sup>a</sup>, Monika Wałęsa-Chorab<sup>a</sup> and Patrycja Żak<sup>a,\*</sup>

<sup>a</sup> Department of Organometallic Chemistry, Faculty of Chemistry, Adam Mickiewicz University in Poznan, Uniwersytetu Poznańskiego 8, 61-614 Poznań, Poland. E-mail: [pkw@amu.edu.pl](mailto:pkw@amu.edu.pl)

**CONTENTS:**

|    |                                                   |      |
|----|---------------------------------------------------|------|
| 1. | Analytical data of isolated products P1-P12       | S-1  |
| 2. | Photophysical spectra of isolated products P1-P12 | S-6  |
| 3. | NMR spectra of isolated products P1-P12           | S-12 |

## 1. Analytical data of isolated products P1-P12

|                                                                                                                                          |                                                                                                                                                                                                                                                                                                                                                                                                                                                                                                                                                                                                                                                                                                                                                                                                                                                                                                                                                                                                                                                                                                                                                                                                                                                                                                                                                                                                                                                                                                                                                                |
|------------------------------------------------------------------------------------------------------------------------------------------|----------------------------------------------------------------------------------------------------------------------------------------------------------------------------------------------------------------------------------------------------------------------------------------------------------------------------------------------------------------------------------------------------------------------------------------------------------------------------------------------------------------------------------------------------------------------------------------------------------------------------------------------------------------------------------------------------------------------------------------------------------------------------------------------------------------------------------------------------------------------------------------------------------------------------------------------------------------------------------------------------------------------------------------------------------------------------------------------------------------------------------------------------------------------------------------------------------------------------------------------------------------------------------------------------------------------------------------------------------------------------------------------------------------------------------------------------------------------------------------------------------------------------------------------------------------|
| 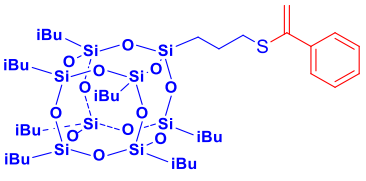 <p style="text-align: center;"><b>Product P1</b></p>   | <p>White solid, isolated yield: 81%, 99.05 mg (<math>9.99 \times 10^{-5}</math> mmol); <math>^1\text{H}</math> NMR (400 MHz, <math>\text{CDCl}_3</math>, 296K): <math>\delta</math> (ppm) 0.57-0.63 (m, 14H, CH), 0.70-0.75 (m, 2H, <math>\text{CH}_2</math>), 0.93-0.99 (m, 42H, <math>\text{CH}_3</math>), 1.67 - 1.77 (m, 2H, <math>\text{CH}_2</math>), 1.81-1.90 (m, 7H, CH), 2.65-2.75 (m, 2H, <math>\text{SCH}_2</math>), 5.15 (s, 1H, <math>=\text{CH}_2</math>), 5.44 (s, 1H, <math>=\text{CH}_2</math>), 7.27-7.41 (m, 3H, <math>-\text{C}_6\text{H}_5</math>), 7.48-7.60 (m, 2H, <math>-\text{C}_6\text{H}_5</math>); <math>^{13}\text{C}</math> NMR (100 MHz, <math>\text{CDCl}_3</math>, 296K): <math>\delta</math> (ppm) 11.73 (<math>\text{CH}_2</math>), 22.42 (<math>\text{CH}_2</math>), 22.47 (<math>\text{CH}_2</math>), 23.83 (CH), 23.88 (CH), 25.68 (<math>\text{CH}_3</math>), 110.22 (<math>=\text{CH}</math>), 127.07, 128.27, 139.80, 144.90 (<math>=\text{CH}_2</math>); <math>^{29}\text{Si}</math> NMR (79 MHz, <math>\text{CDCl}_3</math>, 296K): <math>\delta</math> (ppm) -67.64, -67.89 (core), -68.06 (<math>\text{SiCH}_2</math>); MS (ESI+): <math>m/z</math> 1032 <math>[\text{M}+\text{K}]^+</math>.</p>                                                                                                                                                                                                                                                                                                                |
|  <p style="text-align: center;"><b>Product P2</b></p>  | <p>White solid, isolated yield: 85%, 95.94 mg (<math>9.53 \times 10^{-5}</math> mmol); <math>^1\text{H}</math> NMR (400 MHz, <math>\text{CDCl}_3</math>, 296K): <math>\delta</math> (ppm) 0.57-0.62 (m, 14H, CH), 0.71-0.76 (m, 2H, <math>\text{CH}_2</math>), 0.94-0.97 (m, 42H, <math>\text{CH}_3</math>), 1.69 - 1.77 (m, 2H, <math>\text{CH}_2</math>), 1.82-1.89 (m, 7H, CH), 2.36 (s, 3H, <math>-\text{C}_6\text{H}_4\text{-CH}_3</math>), 2.33-2.40 (m, 2H, <math>\text{SCH}_2</math>), 5.12 (s, 1H, <math>=\text{CH}_2</math>), 5.43 (s, 1H, <math>=\text{CH}_2</math>), 7.10-7.14 (m, 1H, <math>-\text{C}_6\text{H}_4\text{-CH}_3</math>), 7.20-7.24 (m, 1H, <math>-\text{C}_6\text{H}_4\text{-CH}_3</math>), 7.31-7.38 (m, 2H, <math>-\text{C}_6\text{H}_4\text{-CH}_3</math>); <math>^{13}\text{C}</math> NMR (100 MHz, <math>\text{CDCl}_3</math>, 296K): <math>\delta</math> (ppm) 11.74 (<math>\text{CH}_2</math>), 22.42 (<math>\text{CH}_2</math>), 22.47 (<math>\text{CH}_2</math>), 23.83 (CH), 23.87 (CH), 25.68 (<math>\text{CH}_3</math>), 27.39 (<math>\text{CH}_2</math>), 27.65 (<math>\text{CH}_2</math>), 34.77 (<math>\text{CH}_3</math>), 109.79 (<math>=\text{CH}</math>), 124.19, 127.71, 128.16, 129.08, 137.87, 139.87, 144.99 (<math>=\text{CH}_2</math>); <math>^{29}\text{Si}</math> NMR (79 MHz, <math>\text{CDCl}_3</math>, 296K): <math>\delta</math> (ppm) -67.60, -67.86 (core), -68.03 (<math>\text{SiCH}_2</math>); MS (ESI+): <math>m/z</math> 1045 <math>[\text{M}+\text{K}]^+</math>.</p>                         |
|  <p style="text-align: center;"><b>Product P3</b></p> | <p>White solid, isolated yield: 90%, 101.58 mg (<math>1.00 \times 10^{-4}</math> mmol); <math>^1\text{H}</math> NMR (400 MHz, <math>\text{CDCl}_3</math>, 296K): <math>\delta</math> (ppm) 0.57-0.62 (m, 14H, CH), 0.70-0.75 (m, 2H, <math>\text{CH}_2</math>), 0.93-0.99 (m, 42H, <math>\text{CH}_3</math>), 1.70 - 1.77 (m, 2H, <math>\text{CH}_2</math>), 1.82-1.91 (m, 7H, CH), 2.35 (s, 3H, <math>-\text{C}_6\text{H}_4\text{-CH}_3</math>), 2.66-2.74 (m, 2H, <math>\text{SCH}_2</math>), 5.11 (s, 1H, <math>=\text{CH}_2</math>), 5.41 (s, 1H, <math>=\text{CH}_2</math>), 7.14 (d, <math>J_{\text{HH}} = 8.0</math> Hz, 2H, <math>-\text{C}_6\text{H}_4\text{-CH}_3</math>), 7.43 (d, <math>J_{\text{HH}} = 8.0</math> Hz, 2H, <math>-\text{C}_6\text{H}_4\text{-CH}_3</math>); <math>^{13}\text{C}</math> NMR (100 MHz, <math>\text{CDCl}_3</math>, 296K): <math>\delta</math> (ppm) 11.73 (<math>\text{CH}_2</math>), 21.16 (<math>\text{CH}_2</math>), 22.10 (<math>\text{CH}_2</math>), 22.42 (<math>\text{CH}_2</math>), 22.47 (<math>\text{CH}_2</math>), 23.84 (CH), 23.88 (CH), 25.67 (<math>\text{CH}_3</math>), 25.69 (<math>\text{CH}_3</math>), 34.77 (<math>\text{CH}_3</math>), 109.59 (<math>=\text{CH}</math>), 126.93, 128.95, 136.92, 138.18, 137.87, 144.75 (<math>=\text{CH}_2</math>); <math>^{29}\text{Si}</math> NMR (79 MHz, <math>\text{CDCl}_3</math>, 296K): <math>\delta</math> (ppm) -67.65, -67.90 (core), -68.04 (<math>\text{SiCH}_2</math>); MS (ESI+): <math>m/z</math> 1045 <math>[\text{M}+\text{K}]^+</math>.</p> |

|                                                                                                                                          |                                                                                                                                                                                                                                                                                                                                                                                                                                                                                                                                                                                                                                                                                                                                                                                                                                                                                                                                                                                                                                                                                                                                                                                                                                                                                                                                                                                                                                                                                                                                                 |
|------------------------------------------------------------------------------------------------------------------------------------------|-------------------------------------------------------------------------------------------------------------------------------------------------------------------------------------------------------------------------------------------------------------------------------------------------------------------------------------------------------------------------------------------------------------------------------------------------------------------------------------------------------------------------------------------------------------------------------------------------------------------------------------------------------------------------------------------------------------------------------------------------------------------------------------------------------------------------------------------------------------------------------------------------------------------------------------------------------------------------------------------------------------------------------------------------------------------------------------------------------------------------------------------------------------------------------------------------------------------------------------------------------------------------------------------------------------------------------------------------------------------------------------------------------------------------------------------------------------------------------------------------------------------------------------------------|
| 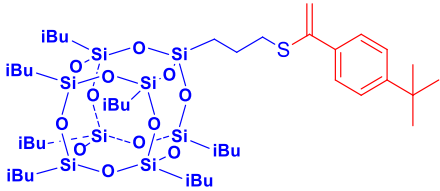 <p style="text-align: center;"><b>Product P4</b></p>   | <p>White solid, isolated yield: 87%, 102.29 mg (<math>9.81 \times 10^{-5}</math> mmol); <math>^1\text{H}</math> NMR (400 MHz, <math>\text{CDCl}_3</math>, 296K): <math>\delta</math> (ppm) 0.57-0.62 (m, 14H, CH), 0.72-0.76 (m, 2H, <math>\text{CH}_2</math>), 0.94-0.97 (m, 42H, <math>\text{CH}_3</math>), 1.36 (s, 9H, <math>\text{C}(\text{CH}_3)_3</math>), 1.71-1.78 (m, 2H, <math>\text{CH}_2</math>), 1.82-1.89 (m, 7H, CH), 2.69-2.76 (m, 2H, <math>\text{SCH}_2</math>), 5.10 (s, 1H, <math>=\text{CH}_2</math>), 5.44 (s, 1H, <math>=\text{CH}_2</math>), 7.36 (d, 2H, <math>J_{\text{HH}} = 8.3</math> Hz, <math>-\text{C}_6\text{H}_4\text{-tBu}</math>), 7.48 (d, 2H, <math>J_{\text{HH}} = 8.3</math> Hz, <math>-\text{C}_6\text{H}_4\text{-tBu}</math>); <math>^{13}\text{C}</math> NMR (100 MHz, <math>\text{CDCl}_3</math>, 296K): <math>\delta</math> (ppm) 11.76 (<math>\text{CH}_2</math>), 22.04 (<math>\text{CH}_3</math>), 22.44 (<math>\text{CH}_2</math>), 22.48 (<math>\text{CH}_2</math>), 23.84 (CH), 23.88 (CH), 25.69 (<math>\text{CH}_3</math>), 31.28 (<math>\text{CH}_2</math>), 34.56 (<math>\text{CH}_2</math>), 34.79 (<math>\text{CH}_2</math>), 109.25 (<math>=\text{CH}</math>), 125.19, 126.65, 136.91, 144.66, 151.38 (<math>=\text{CH}_2</math>); <math>^{29}\text{Si}</math> NMR (79 MHz, <math>\text{CDCl}_3</math>, 296K): <math>\delta</math> (ppm) -67.64, -67.90 (core), -68.02 (<math>\text{SiCH}_2</math>); MS (ESI+): <math>m/z</math> 1087 <math>[\text{M}+\text{K}]^+</math>.</p>        |
|  <p style="text-align: center;"><b>Product P5</b></p>  | <p>White solid, isolated yield: 88%, 105.94 mg (<math>9.99 \times 10^{-5}</math> mmol); <math>^1\text{H}</math> NMR (400 MHz, <math>\text{CDCl}_3</math>, 296K): <math>\delta</math> (ppm) 0.59-0.61 (m, 14H, CH), 0.71-0.75 (m, 2H, <math>\text{CH}_2</math>), 0.94-0.96 (m, 42H, <math>\text{CH}_3</math>), 1.71-1.77 (m, 2H, <math>\text{CH}_2</math>), 1.83-1.90 (m, 7H, CH), 2.72 (t, 2H, <math>J_{\text{HH}} = 7.3</math> Hz, <math>\text{SCH}_2</math>), 5.24 (s, 1H, <math>=\text{CH}_2</math>), 5.50 (s, 1H, <math>=\text{CH}_2</math>), 7.59 (d, 2H, <math>J_{\text{HH}} = 8.3</math> Hz, <math>-\text{C}_6\text{H}_4\text{-CF}_3</math>), 7.65 (d, 2H, <math>J_{\text{HH}} = 8.3</math> Hz, <math>-\text{C}_6\text{H}_4\text{-CF}_3</math>); <math>^{13}\text{C}</math> NMR (100 MHz, <math>\text{CDCl}_3</math>, 296K): <math>\delta</math> (ppm) 11.70 (<math>\text{CH}_2</math>), 22.04 (<math>\text{CH}_2</math>), 22.43 (<math>\text{CH}_2</math>), 22.46 (<math>\text{CH}_2</math>), 23.84 (CH), 23.88 (CH), 25.68 (<math>\text{CH}_3</math>), 25.68 (<math>\text{CH}_3</math>), 34.83 (<math>\text{CH}_2</math>), 111.92 (<math>=\text{CH}</math>), 122.69, 125.28 (dd, <math>J = 7.6, 3.8</math> Hz), 127.39, 127.65, 130.12, 130.45, 143.40, 143.84 (<math>=\text{CH}_2</math>); <math>^{29}\text{Si}</math> NMR (79 MHz, <math>\text{CDCl}_3</math>, 296K): <math>\delta</math> (ppm) -67.61, -67.86 (core), -68.16 (<math>\text{SiCH}_2</math>); MS (ESI+): <math>m/z</math> 1100 <math>[\text{M}+\text{K}]^+</math>.</p> |
|  <p style="text-align: center;"><b>Product P6</b></p> | <p>White solid, isolated yield: 86%, 108.83 mg (<math>9.64 \times 10^{-5}</math> mmol); <math>^1\text{H}</math> NMR (400 MHz, <math>\text{CDCl}_3</math>, 296K): <math>\delta</math> (ppm) 0.59-0.63 (m, 14H, CH), 0.73-0.78 (m, 2H, <math>\text{CH}_2</math>), 0.94-0.97 (m, 42H, <math>\text{CH}_3</math>), 1.77-1.88 (m, 9H, <math>\text{CH}_2</math> and CH), 2.76 (t, 2H, <math>J_{\text{HH}} = 7.3</math> Hz, <math>\text{SCH}_2</math>), 5.29 (s, 1H, <math>=\text{CH}_2</math>), 5.56 (s, 1H, <math>=\text{CH}_2</math>), 7.82 – 7.84 (m, 2H, <math>-\text{C}_6\text{H}_3\text{-CF}_3</math>), 7.96 – 8.00 (m, 2H, <math>-\text{C}_6\text{H}_3\text{-CF}_3</math>); <math>^{13}\text{C}</math> NMR (100 MHz, <math>\text{CDCl}_3</math>, 296K): <math>\delta</math> (ppm) 11.71 (<math>\text{CH}_2</math>), 21.92 (<math>\text{CH}_2</math>), 22.42 (<math>\text{CH}_2</math>), 22.46 (<math>\text{CH}_2</math>), 23.84 (CH), 23.88 (CH), 25.64 (<math>\text{CH}_3</math>), 25.68 (<math>\text{CH}_3</math>), 35.01 (<math>\text{CH}_2</math>), 112.62 (<math>=\text{CH}</math>), 121.83, 122.01 (dd, <math>J = 7.4, 3.6</math> Hz), 124.55, 127.18 (d, <math>J = 2.6</math> Hz), 131.23, 131.56, 131.89, 132.22, 142.09, 142.79 (<math>=\text{CH}_2</math>); <math>^{29}\text{Si}</math> NMR (79 MHz, <math>\text{CDCl}_3</math>, 296K): <math>\delta</math> (ppm) -67.60, -67.87 (core), -68.30 (<math>\text{SiCH}_2</math>); MS (ESI+): <math>m/z</math> 1167 <math>[\text{M}+\text{K}]^+</math>.</p>                                |

|                                                                                                                                          |                                                                                                                                                                                                                                                                                                                                                                                                                                                                                                                                                                                                                                                                                                                                                                                                                                                                                                                                                                                                                                                                                                                                                                                                                                                                                                                                                                                                                                                                                                                                                                                                                                                                                             |
|------------------------------------------------------------------------------------------------------------------------------------------|---------------------------------------------------------------------------------------------------------------------------------------------------------------------------------------------------------------------------------------------------------------------------------------------------------------------------------------------------------------------------------------------------------------------------------------------------------------------------------------------------------------------------------------------------------------------------------------------------------------------------------------------------------------------------------------------------------------------------------------------------------------------------------------------------------------------------------------------------------------------------------------------------------------------------------------------------------------------------------------------------------------------------------------------------------------------------------------------------------------------------------------------------------------------------------------------------------------------------------------------------------------------------------------------------------------------------------------------------------------------------------------------------------------------------------------------------------------------------------------------------------------------------------------------------------------------------------------------------------------------------------------------------------------------------------------------|
| 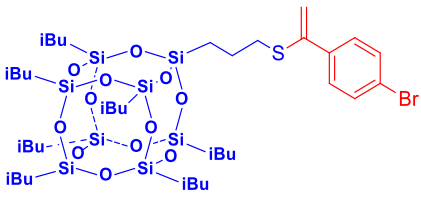 <p style="text-align: center;"><b>Product P7</b></p>   | <p>White solid, isolated yield: 92%, 110.43 mg (<math>1.03 \times 10^{-4}</math> mmol); <math>^1\text{H}</math> NMR (400 MHz, <math>\text{CDCl}_3</math>, 296K): <math>\delta</math> (ppm) 0.59-0.62 (m, 14H, CH), 0.70-0.76 (m, 2H, <math>\text{CH}_2</math>), 0.94-0.97 (m, 42H, <math>\text{CH}_3</math>), 1.76-1.81 (m, 2H, <math>\text{CH}_2</math>), 1.82 – 1.89 (m, 7H, CH), 2.68 – 2.72 (m, 2H, <math>\text{SCH}_2</math>), 5.17 (s, 1H, <math>=\text{CH}_2</math>), 5.43 (s, 1H, <math>=\text{CH}_2</math>), 7.39 – 7.43 (m, 2H, <math>-\text{C}_6\text{H}_4\text{-Br}</math>), 7.44 – 7.48 (m, 2H, <math>-\text{C}_6\text{H}_4\text{-Br}</math>); <math>^{13}\text{C}</math> NMR (100 MHz, <math>\text{CDCl}_3</math>, 296K): <math>\delta</math> (ppm) 11.71 (<math>\text{CH}_2</math>), 22.08 (<math>\text{CH}_2</math>), 22.44 (<math>\text{CH}_2</math>), 22.47 (<math>\text{CH}_2</math>), 23.84 (CH), 23.88 (CH), 25.67 (<math>\text{CH}_3</math>), 25.69 (<math>\text{CH}_3</math>), 34.81 (<math>\text{CH}_2</math>), 110.88 (<math>=\text{CH}</math>), 122.33, 128.68, 131.41, 138.76, 143.91 (<math>=\text{CH}_2</math>); <math>^{29}\text{Si}</math> NMR (79 MHz, <math>\text{CDCl}_3</math>, 296K): <math>\delta</math> (ppm) -67.64, -67.88 (core), -68.12 (<math>\text{SiCH}_2</math>); MS (ESI+): <math>m/z</math> 1111 [<math>\text{M}+\text{K}</math>]<math>^+</math>.</p>                                                                                                                                                                                                                                                                                       |
|  <p style="text-align: center;"><b>Product P8</b></p>  | <p>White solid, isolated yield: 83%, 92.93 mg (<math>9.31 \times 10^{-5}</math> mmol); <math>^1\text{H}</math> NMR (400 MHz, <math>\text{CDCl}_3</math>, 296K): <math>\delta</math> (ppm) 0.58-0.61 (m, 14H, CH), 0.72-0.77 (m, 2H, <math>\text{CH}_2</math>), 0.94-0.97 (m, 42H, <math>\text{CH}_3</math>), 1.79-1.88 (m, 9H, <math>\text{CH}_2</math> and CH), 2.75 – 2.80 (m, 2H, <math>\text{SCH}_2</math>), 5.07 (s, 1H, <math>=\text{CH}_2</math>), 5.53 (s, 1H, <math>=\text{CH}_2</math>), 7.24 – 7.25 and 7.27 - 7.31 (m, 2H, <math>-\text{C}_4\text{H}_3\text{S}</math>), 7.44 – 7.50 (dd, 1H, <math>J_{\text{HH}} = 2.9, 1.4</math> Hz, <math>-\text{C}_4\text{H}_3\text{S}</math>); <math>^{13}\text{C}</math> NMR (100 MHz, <math>\text{CDCl}_3</math>, 296K): <math>\delta</math> (ppm) 11.78 (<math>\text{CH}_2</math>), 22.06 (<math>\text{CH}_2</math>), 22.43 (<math>\text{CH}_2</math>), 22.47 (<math>\text{CH}_2</math>), 23.83 (CH), 23.87 (CH), 25.67 (<math>\text{CH}_3</math>), 25.68 (<math>\text{CH}_3</math>), 34.65 (<math>\text{CH}_2</math>), 108.57 (<math>=\text{CH}</math>), 122.19, 125.60, 126.03, 138.89 (<math>=\text{CH}_2</math>); <math>^{29}\text{Si}</math> NMR (79 MHz, <math>\text{CDCl}_3</math>, 296K): <math>\delta</math> (ppm) -67.61, -67.87 (core), -68.04 (<math>\text{SiCH}_2</math>); MS (ESI+): <math>m/z</math> 1037 [<math>\text{M}+\text{K}</math>]<math>^+</math>.</p>                                                                                                                                                                                                                                                           |
|  <p style="text-align: center;"><b>Product P9</b></p> | <p>White solid, isolated yield: 91%, 106.38 mg (<math>1.02 \times 10^{-4}</math> mmol); <math>^1\text{H}</math> NMR (400 MHz, <math>\text{CDCl}_3</math>, 296K): <math>\delta</math> (ppm) 0.59-0.63 (m, 14H, CH), 0.71-0.74 (m, 2H, <math>\text{CH}_2</math>), 0.94-0.98 (m, 42H, <math>\text{CH}_3</math>), 1.76-1.81 (m, 2H, <math>\text{CH}_2</math>), 1.83 – 1.91 (m, 7H, CH), 2.69 – 2.74 (m, 2H, <math>\text{SCH}_2</math>), 5.32 (s, 1H, <math>=\text{CH}_2</math>), 5.43 (s, 1H, <math>=\text{CH}_2</math>), 7.42 – 7.46 (m, 2H, <math>-\text{C}_6\text{H}_3\text{-C}_6\text{H}_4</math>), 7.47 – 7.50 (m, 2H, <math>-\text{C}_6\text{H}_3\text{-C}_6\text{H}_4</math>), 7.79 – 7.82 (m, 1H, <math>-\text{C}_6\text{H}_3\text{-C}_6\text{H}_4</math>), 7.83 – 7.76 (m, 1H, <math>-\text{C}_6\text{H}_3\text{-C}_6\text{H}_4</math>), 8.23 – 8.26 (m, 1H, <math>-\text{C}_6\text{H}_3\text{-C}_6\text{H}_4</math>); <math>^{13}\text{C}</math> NMR (100 MHz, <math>\text{CDCl}_3</math>, 296K): <math>\delta</math> (ppm) 11.84 (<math>\text{CH}_2</math>), 22.18 (<math>\text{CH}_2</math>), 22.45 (<math>\text{CH}_2</math>), 22.48 (<math>\text{CH}_2</math>), 23.84 (CH), 23.89 (CH), 25.68 (<math>\text{CH}_3</math>), 34.89 (<math>\text{CH}_2</math>), 111.82 (<math>=\text{CH}</math>), 121.83, 125.05, 125.68, 125.86, 126.04, 126.49, 128.14, 128.34, 131.21, 133.60, 138.04, 143.54 (<math>=\text{CH}_2</math>); <math>^{29}\text{Si}</math> NMR (79 MHz, <math>\text{CDCl}_3</math>, 296K): <math>\delta</math> (ppm) -67.63, -67.89 (core), -68.09 (<math>\text{SiCH}_2</math>); MS (ESI+): <math>m/z</math> 1083 [<math>\text{M}+\text{K}</math>]<math>^+</math>.</p> |

|                                                                                                                                           |                                                                                                                                                                                                                                                                                                                                                                                                                                                                                                                                                                                                                                                                                                                                                                                                                                                                                                                                                                                                                                                                                                                                                                                                                                                                                                                                                                                                                                                                                                                                                                                                                                                                                                                                                                                                                  |
|-------------------------------------------------------------------------------------------------------------------------------------------|------------------------------------------------------------------------------------------------------------------------------------------------------------------------------------------------------------------------------------------------------------------------------------------------------------------------------------------------------------------------------------------------------------------------------------------------------------------------------------------------------------------------------------------------------------------------------------------------------------------------------------------------------------------------------------------------------------------------------------------------------------------------------------------------------------------------------------------------------------------------------------------------------------------------------------------------------------------------------------------------------------------------------------------------------------------------------------------------------------------------------------------------------------------------------------------------------------------------------------------------------------------------------------------------------------------------------------------------------------------------------------------------------------------------------------------------------------------------------------------------------------------------------------------------------------------------------------------------------------------------------------------------------------------------------------------------------------------------------------------------------------------------------------------------------------------|
| 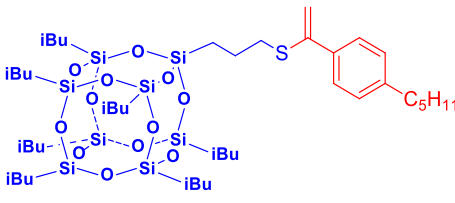 <p style="text-align: center;"><b>Product P10</b></p>   | <p>White solid, isolated yield: 85%, 95.32 mg (<math>8.97 \times 10^{-5}</math> mmol); <math>^1\text{H}</math> NMR (400 MHz, <math>\text{CDCl}_3</math>, 296K): <math>\delta</math> (ppm) 0.57-0.62 (m, 14H, CH), 0.71-0.75 (m, 2H, <math>\text{CH}_2</math>), 0.94-0.97 (m, 42H, <math>\text{CH}_3</math>), 1.25 – 1.36 (m, 7H, <math>\text{CH}_2</math> and <math>\text{CH}_3</math>), 1.59 - 1.64 (m, 2H, <math>\text{CH}_2</math>), 1.71 – 1.76 (m, 2H, <math>\text{CH}_2</math>), 1.81 – 1.88 (m, 7H, CH), 2.57 – 2.62 (m, 2H, <math>\text{CH}_2</math>), 2.68 – 2.75 (m, 2H, <math>\text{SCH}_2</math>), 5.10 (s, 1H, <math>=\text{CH}_2</math>), 5.42 (s, 1H, <math>=\text{CH}_2</math>), 7.14 (d, 2H, <math>J_{\text{HH}} = 8.4</math> Hz, <math>-\text{C}_6\text{H}_5-\text{C}_5\text{H}_{11}</math>), 7.45 (d, 2H, <math>J_{\text{HH}} = 8.4</math> Hz, <math>-\text{C}_6\text{H}_5-\text{C}_5\text{H}_{11}</math>); <math>^{13}\text{C}</math> NMR (100 MHz, <math>\text{CDCl}_3</math>, 296K): <math>\delta</math> (ppm) 11.74 (<math>\text{CH}_2</math>), 14.01 (<math>\text{CH}_3</math>), 22.07 (<math>\text{CH}_2</math>), 22.43 (<math>\text{CH}_2</math>), 22.47 (<math>\text{CH}_2</math>), 22.52 (<math>\text{CH}_2</math>), 23.83 (CH), 23.87 (CH), 25.67 (<math>\text{CH}_3</math>), 25.68 (<math>\text{CH}_3</math>), 31.05 (<math>\text{CH}_2</math>), 31.49 (<math>\text{CH}_2</math>), 34.78 (<math>\text{CH}_2</math>), 35.61 (<math>\text{CH}_2</math>), 109.34 (<math>=\text{CH}</math>), 126.88, 128.29, 137.10, 143.26 (<math>=\text{CH}_2</math>); <math>^{29}\text{Si}</math> NMR (79 MHz, <math>\text{CDCl}_3</math>, 296K): -67.63, -67.89 (core), -68.06 (<math>\text{SiCH}_2</math>); MS (ESI+): <math>m/z</math> 1102 [<math>\text{M}+\text{K}</math>]<math>^+</math>.</p> |
|  <p style="text-align: center;"><b>Product P11</b></p>  | <p>White solid, isolated yield: 91%, 103.73 mg (<math>1.02 \times 10^{-4}</math> mmol); <math>^1\text{H}</math> NMR (400 MHz, <math>\text{CDCl}_3</math>, 296K): <math>\delta</math> (ppm) 0.57-0.61 (m, 14H, CH), 0.70-0.74 (m, 2H, <math>\text{CH}_2</math>), 0.94-0.97 (m, 42H, <math>\text{CH}_3</math>), .70-1.75 (m, 2H, <math>\text{CH}_2</math>), 1.82-1.88 (m, 7H, CH), 2.68-2.72 (m, 2H, <math>\text{SCH}_2</math>), 3.11 (s, 1H, <math>\text{C}\equiv\text{CH}</math>), 5.20 (s, 1H, <math>=\text{CH}_2</math>), 5.47 (s, 1H, <math>=\text{CH}_2</math>), 7.45-7.48 (m, 2H, <math>-\text{C}_6\text{H}_4</math>), 7.49-7.52 (m, 2H, <math>-\text{C}_6\text{H}_4</math>); <math>^{13}\text{C}</math> NMR (100 MHz, <math>\text{CDCl}_3</math>, 296K): <math>\delta</math> (ppm) 11.70 (<math>\text{CH}_2</math>), 22.09 (<math>\text{CH}_2</math>), 22.43 (<math>\text{CH}_2</math>), 22.47 (<math>\text{CH}_2</math>), 23.84 (CH), 23.88 (CH), 25.68 (<math>\text{CH}_3</math>), 24.80 (<math>\text{CH}_2</math>), 77.90 (CH), 83.36 (<math>\text{C}\equiv</math>), 111.22 (<math>=\text{CH}_2</math>), 122.00, 126.99, 132.07, 140.18, 144.90 (<math>=\text{CH}_2</math>); <math>^{29}\text{Si}</math> NMR (79 MHz, <math>\text{CDCl}_3</math>, 296K): <math>\delta</math> (ppm) -67.64, -67.88 (core), -68.11 (<math>\text{SiCH}_2</math>); MS (ESI+): <math>m/z</math> 1056 [<math>\text{M}+\text{K}</math>]<math>^+</math>.</p>                                                                                                                                                                                                                                                                                                                                                                    |
|  <p style="text-align: center;"><b>Product P12</b></p> | <p>White solid, isolated yield: 84%, 98.95 mg (<math>9.42 \times 10^{-5}</math> mmol); <math>^1\text{H}</math> NMR (400 MHz, <math>\text{CDCl}_3</math>, 296K): <math>\delta</math> (ppm) 0.34 (s, 6H, <math>\text{Si}(\text{CH}_3)_2</math>), 0.58-0.61 (m, 14H, CH), 0.71-0.75 (m, 2H, <math>\text{CH}_2</math>), 0.94-0.96 (m, 42H, <math>\text{CH}_3</math>), 1.72-1.77 (m, 2H, <math>\text{CH}_2</math>), 1.83-1.88 (m, 7H, CH), 2.75 (t, 2H, <math>J_{\text{HH}} = 7.4</math> Hz, <math>\text{SCH}_2</math>), 5.80 (d, 1H, <math>J_{\text{HH}} = 18.2</math> Hz, <math>=\text{CH}</math>), 6.59 (d, 1H, <math>J_{\text{HH}} = 18.2</math> Hz, <math>=\text{CH}</math>), 7.34-7.36 (m, 3H, <math>-\text{C}_6\text{H}_5</math>), 7.50-7.52 (m, 2H, <math>-\text{C}_6\text{H}_5</math>); <math>^{13}\text{C}</math> NMR (100 MHz, <math>\text{CDCl}_3</math>, 296K): <math>\delta</math> (ppm) -2.32 (<math>\text{SiCH}_3</math>), 11.80 (<math>\text{CH}_2</math>), 22.09 (<math>\text{CH}_2</math>), 22.48 (<math>\text{CH}_2</math>), 22.70 (<math>\text{CH}_2</math>), 23.84 (CH), 23.87 (CH), 25.68 (<math>\text{CH}_3</math>), 34.02 (<math>\text{CH}_2</math>), 121.80 (<math>=\text{CH}</math>), 127.76, 126.99, 128.98, 133.82, 141.06 (<math>=\text{CH}</math>); <math>^{29}\text{Si}</math> NMR (79 MHz, <math>\text{CDCl}_3</math>, 296K): <math>\delta</math> (ppm) -21.99 (<math>\text{SiCH}_3</math>), -67.61, -67.86 (core), -68.15 (<math>\text{SiCH}_2</math>); MS (ESI+): <math>m/z</math> 1090 [<math>\text{M}+\text{K}</math>]<math>^+</math>.</p>                                                                                                                                                                                                                                       |

## 2. Photophysical spectra

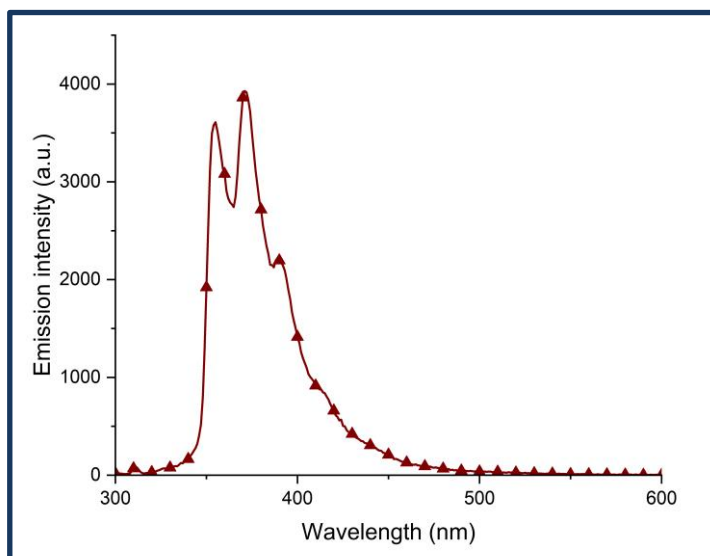

Figure S1. Emission spectra of compound **P9** ( $\lambda_{\text{ex.}} = 285$  nm).

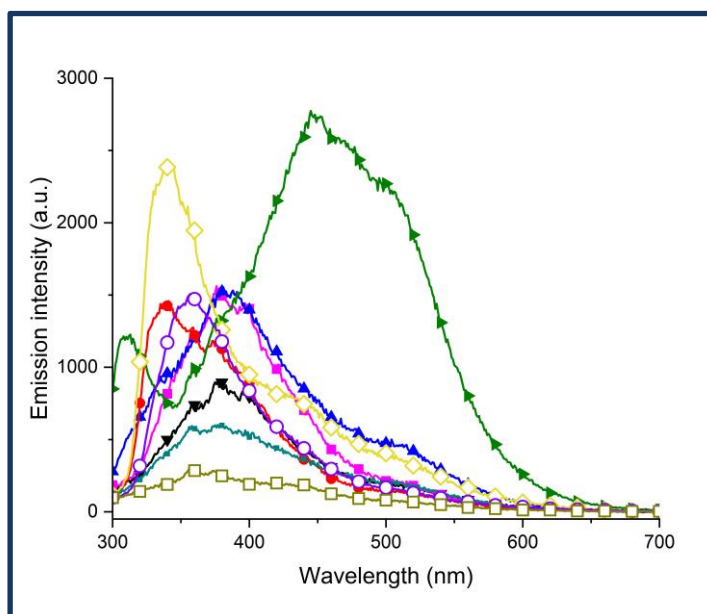

Figure S2. Emission spectra of compounds excited at the absorption maxima: **P1** (●) ( $\lambda_{\text{ex.}} = 245$  nm), **P2** (▲) ( $\lambda_{\text{ex.}} = 250$  nm), **P3** (■) ( $\lambda_{\text{ex.}} = 245$  nm), **P4** (▼) ( $\lambda_{\text{ex.}} = 255$  nm), **P7** (⋆) ( $\lambda_{\text{ex.}} = 250$  nm), **P8** (◇) ( $\lambda_{\text{ex.}} = 252$  nm), **P10** (○) ( $\lambda_{\text{ex.}} = 245$  nm), **P11** (▶) ( $\lambda_{\text{ex.}} = 261$  nm) and **P12** (□) ( $\lambda_{\text{ex.}} = 255$  nm).

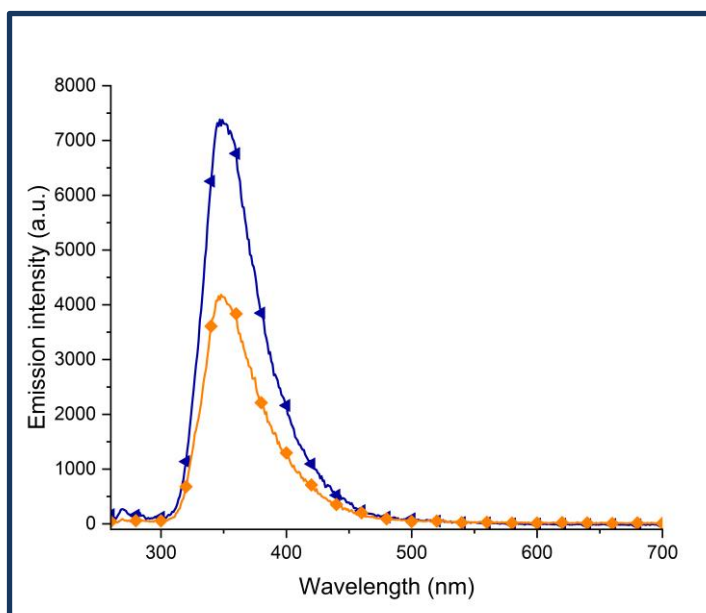

Figure S3. Emission spectra of compounds excited at the absorption maxima: **P5** ( $\blacktriangleleft$ ) ( $\lambda_{\text{ex.}} = 242 \text{ nm}$ ) and **P6** ( $\blacklozenge$ ) ( $\lambda_{\text{ex.}} = 242 \text{ nm}$ ).

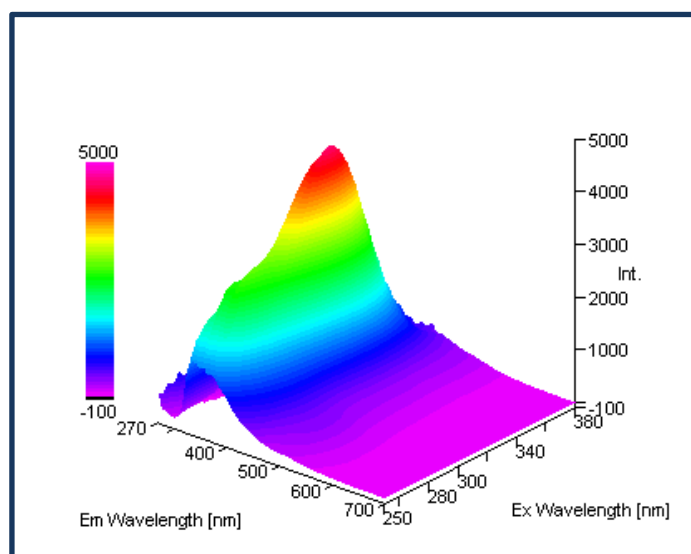

Figure S4. The dependence of the photoluminescence spectra on the excitation wavelength for compound **P1**.

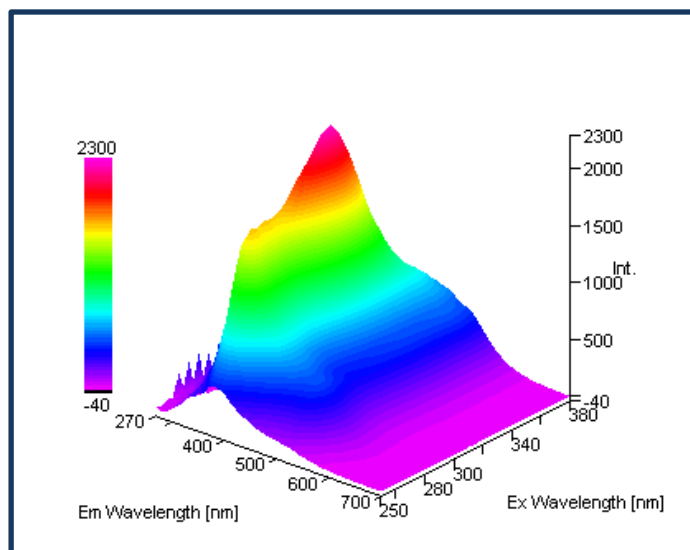

Figure S5. The dependence of the photoluminescence spectra on the excitation wavelength for compound **P2**.

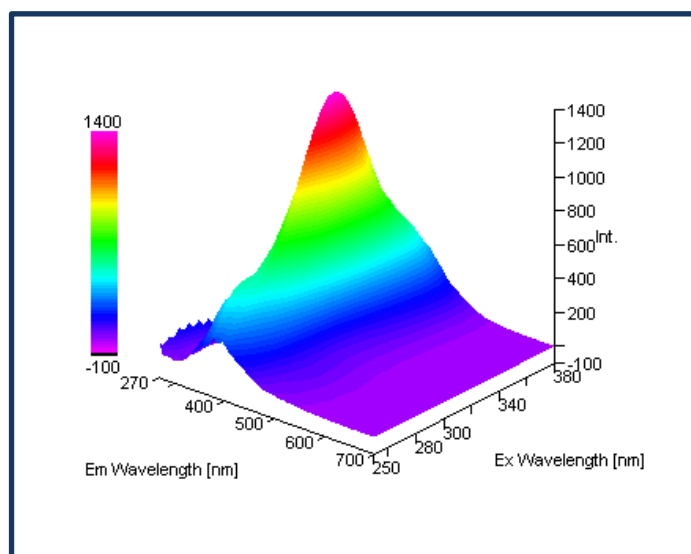

Figure S6. The dependence of the photoluminescence spectra on the excitation wavelength for compound **P3**.



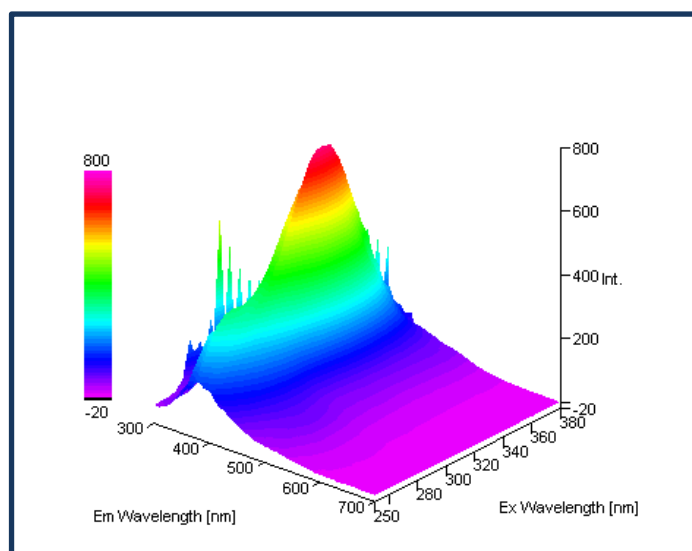

Figure S7. The dependence of the photoluminescence spectra on the excitation wavelength for compound **P4**.

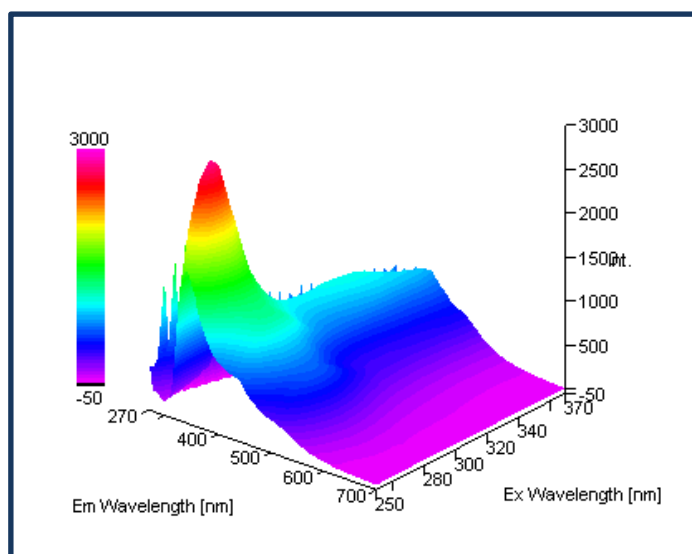

Figure S8. The dependence of the photoluminescence spectra on the excitation wavelength for compound **P8**.

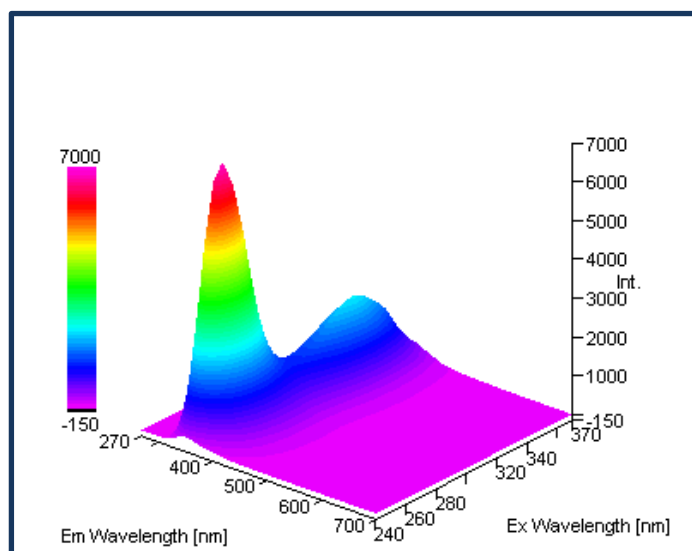

Figure S9. The dependence of the photoluminescence spectra on the excitation wavelength for compound **P5**.

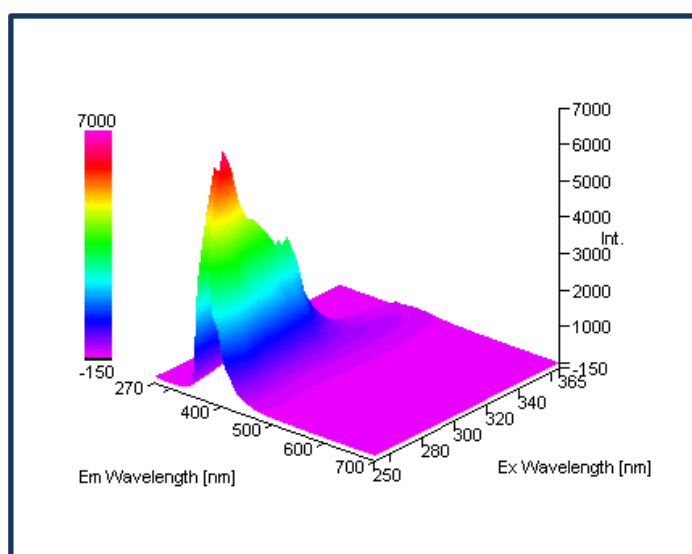

Figure S010. The dependence of the photoluminescence spectra on the excitation wavelength for compound **P9**.

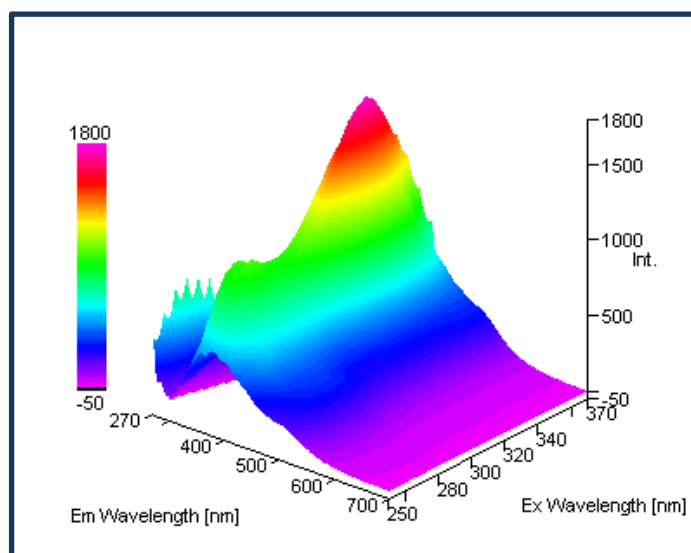

Figure S11. The dependence of the photoluminescence spectra on the excitation wavelength for compound **P7**.

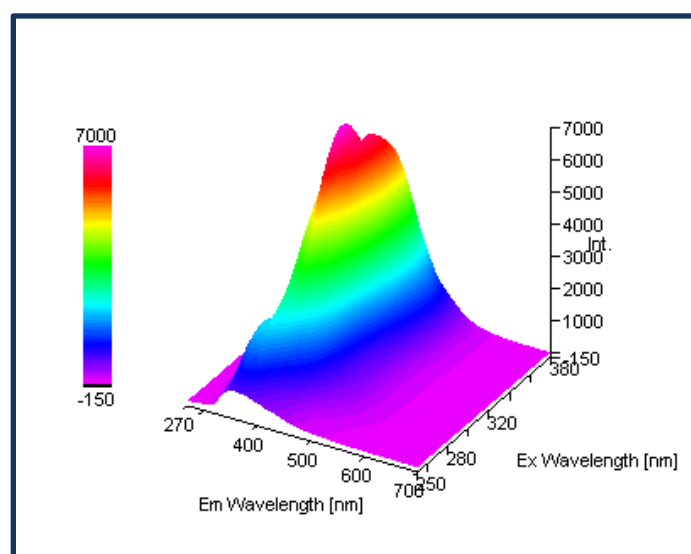

Figure S12. The dependence of the photoluminescence spectra on the excitation wavelength for compound **P10**.

### 3. NMR spectra of isolated products P1-P12

#### Product P1

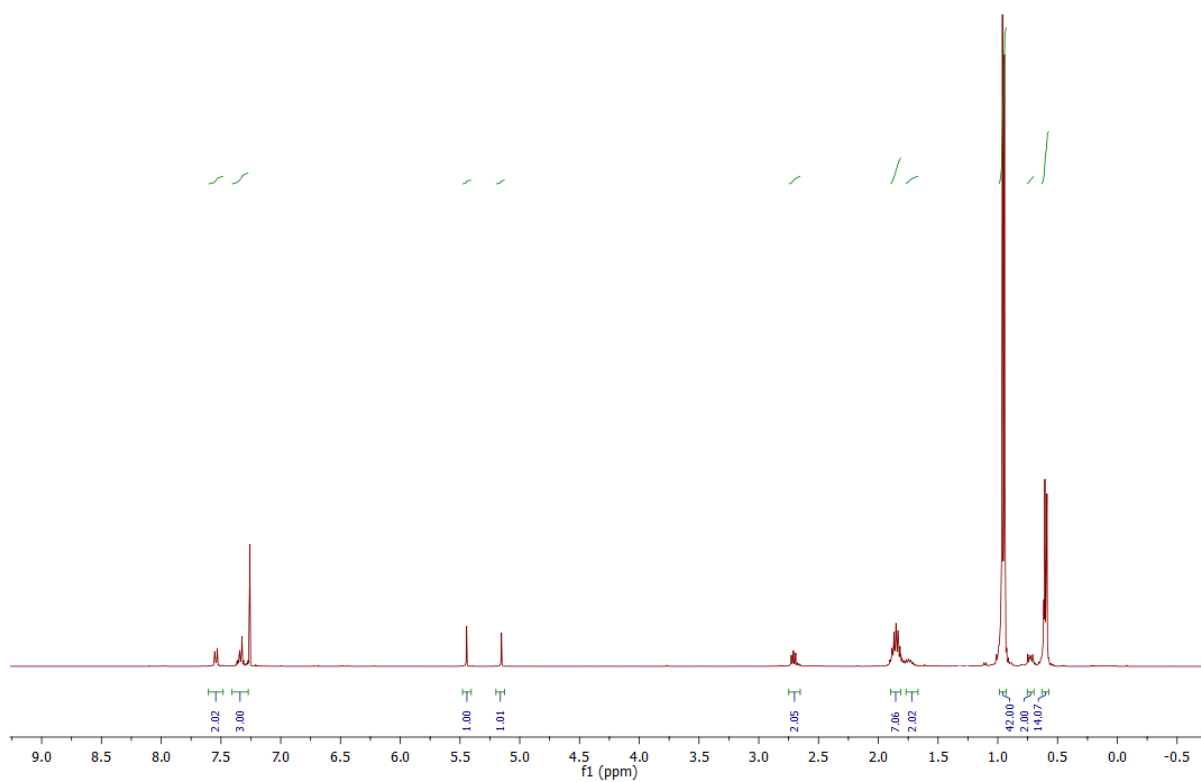

Figure S13.  $^1\text{H}$  NMR (400 MHz,  $\text{CDCl}_3$ ) of product **P1**

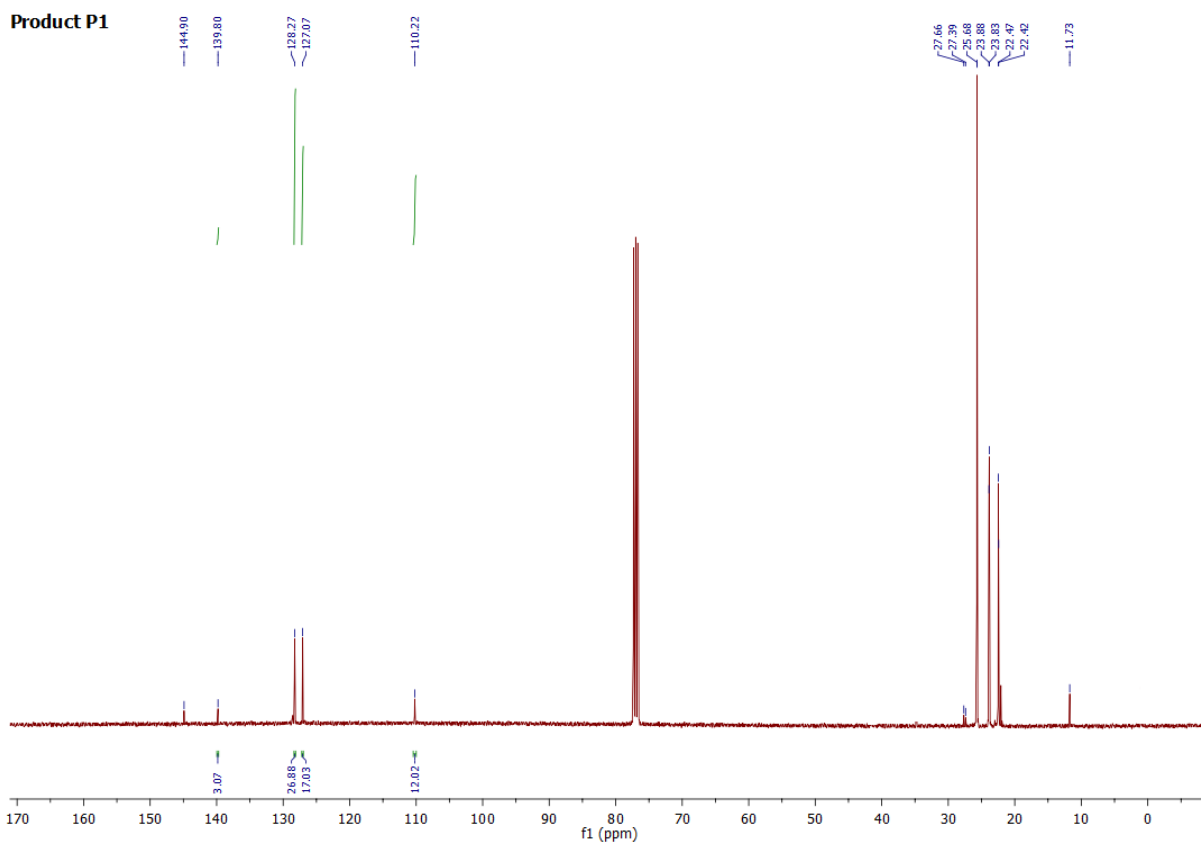

Figure S14.  $^{13}\text{C}$  NMR (101 MHz,  $\text{CDCl}_3$ ) of product **P1**

Product P1

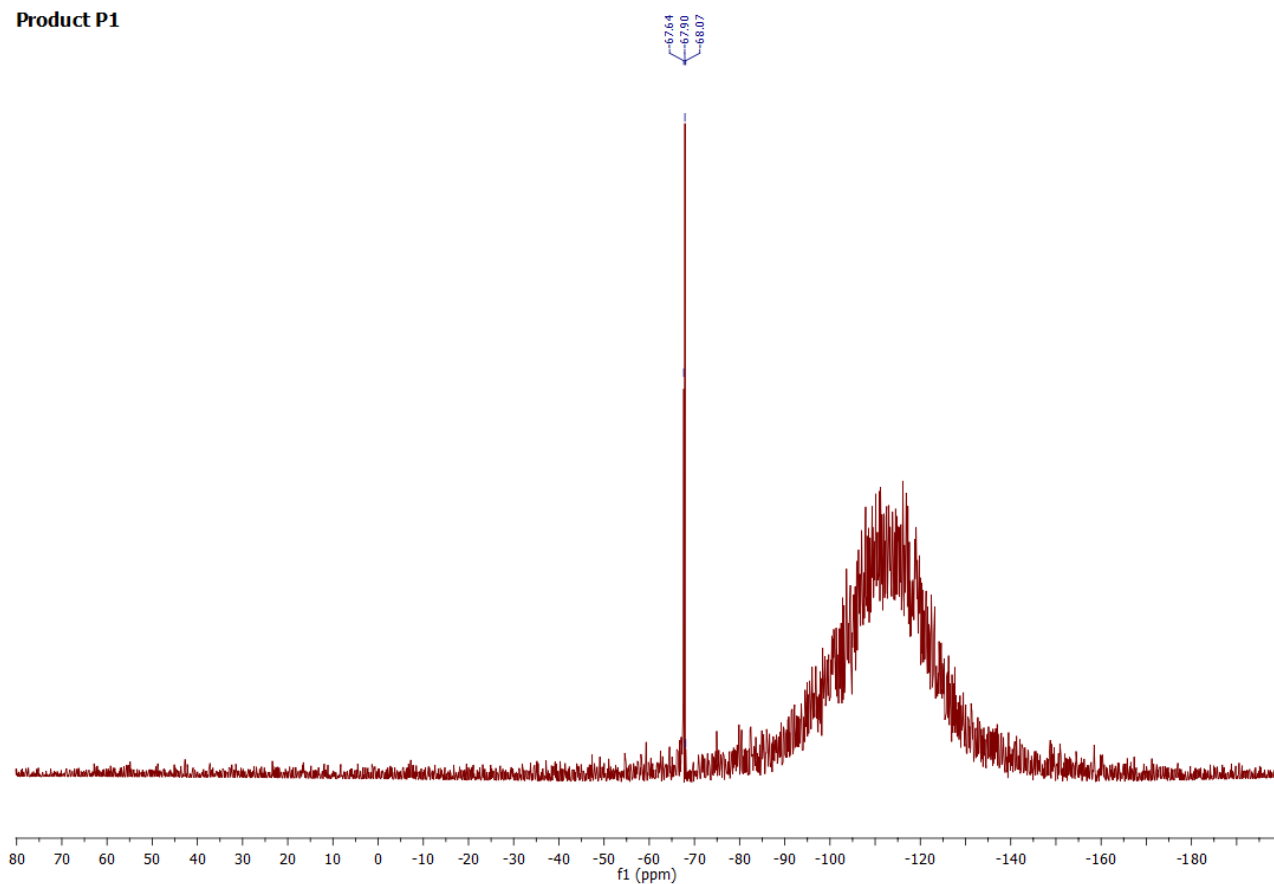

Figure S15.  $^{29}\text{Si}$  NMR (79 MHz,  $\text{CDCl}_3$ ) of product P1

Product 2

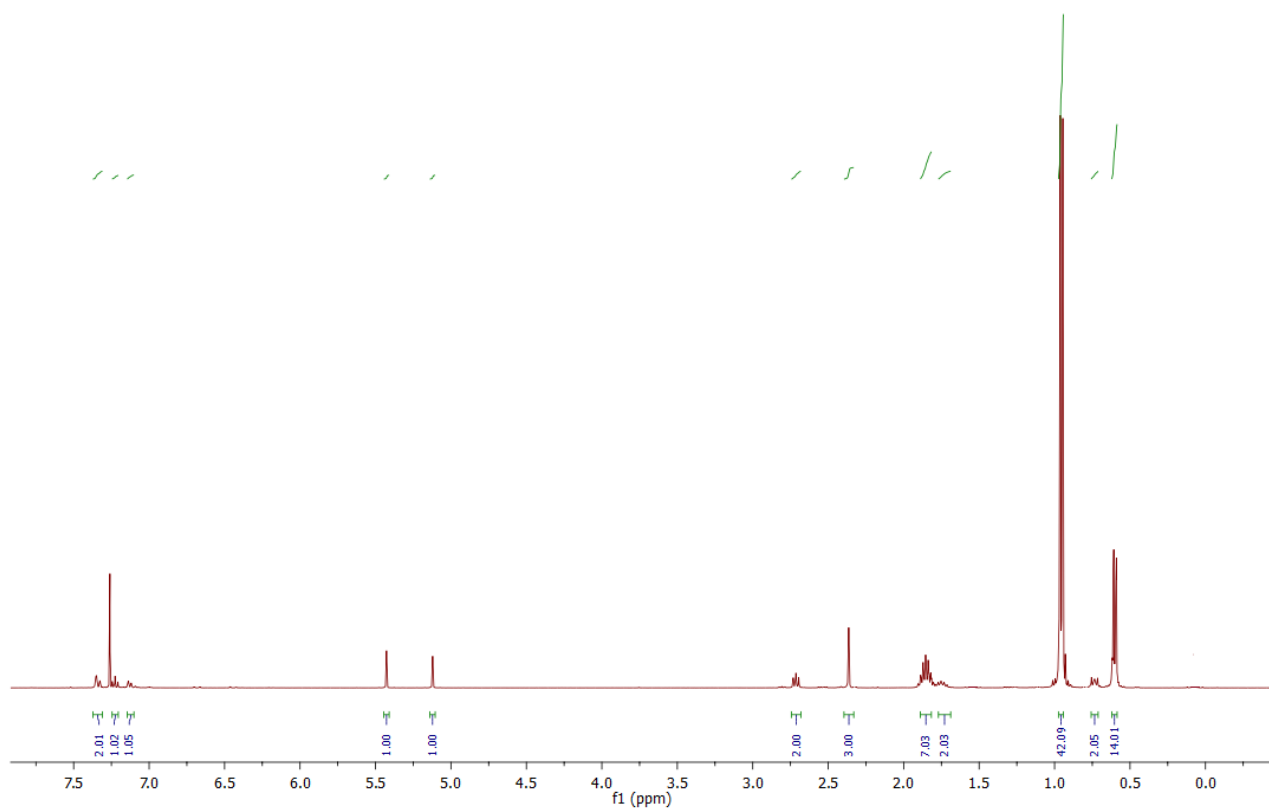

Figure S16.  $^1\text{H}$  NMR (400 MHz,  $\text{CDCl}_3$ ) of product P2

Product P2

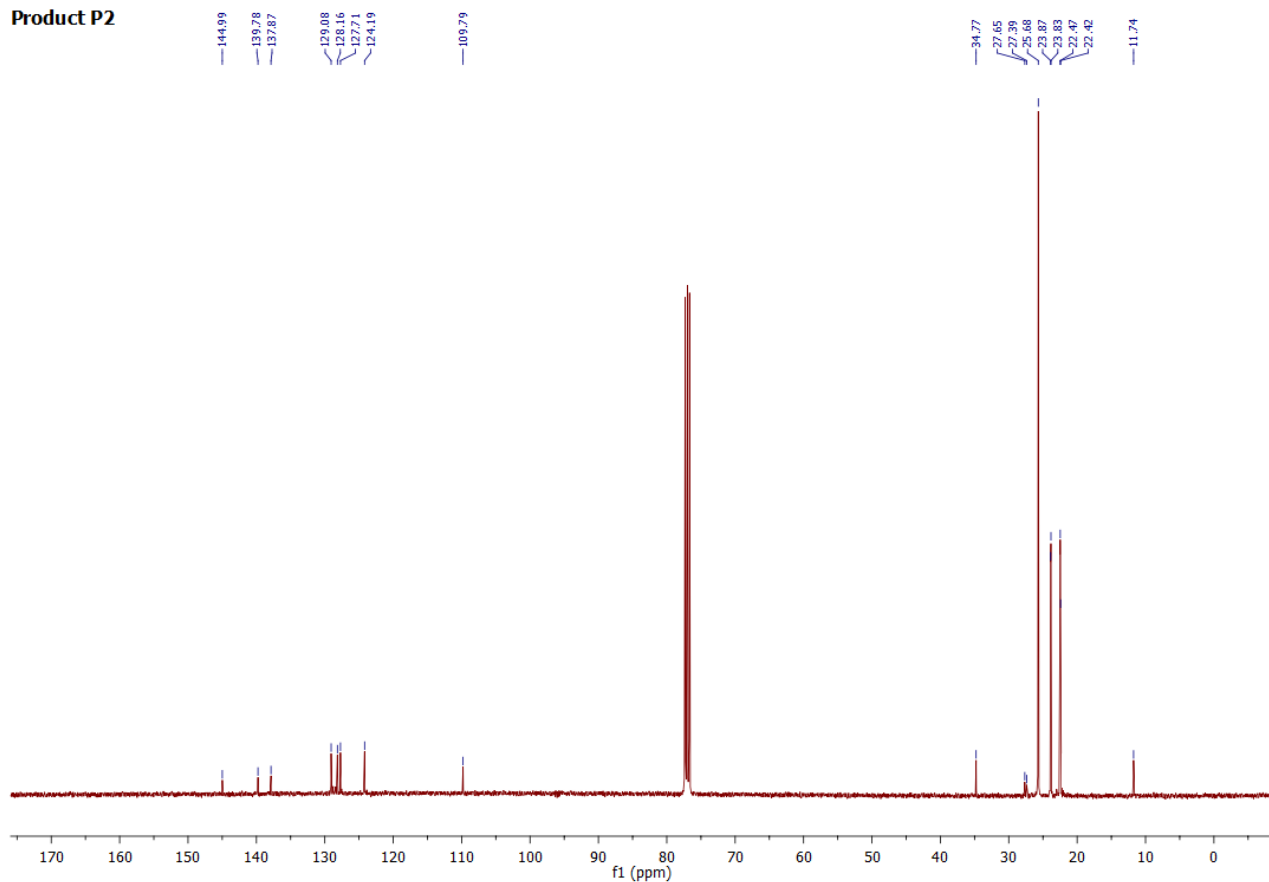

Figure S17.  $^{13}\text{C}$  NMR (101 MHz,  $\text{CDCl}_3$ ) of product P2

Product P2

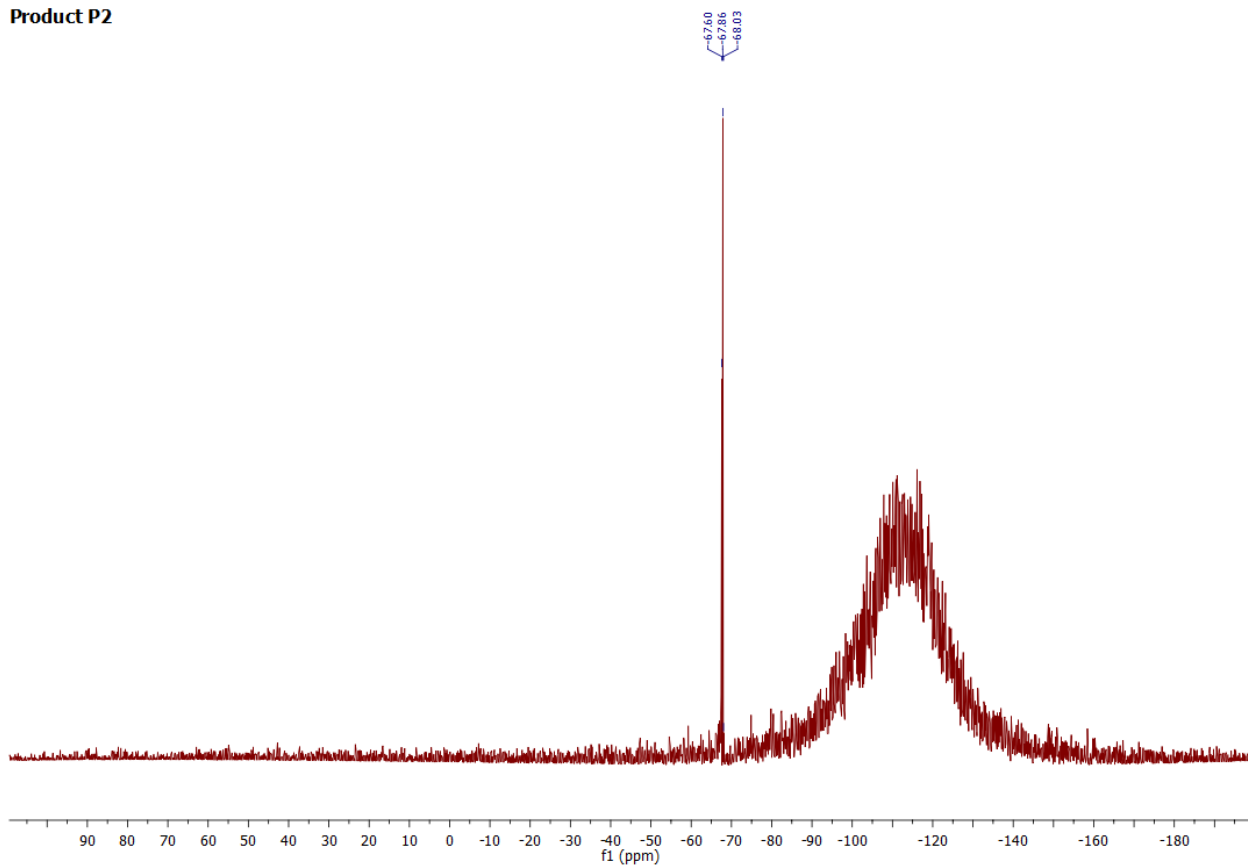

Figure S18.  $^{29}\text{Si}$  NMR (79 MHz,  $\text{CDCl}_3$ ) of product P2

Product P3

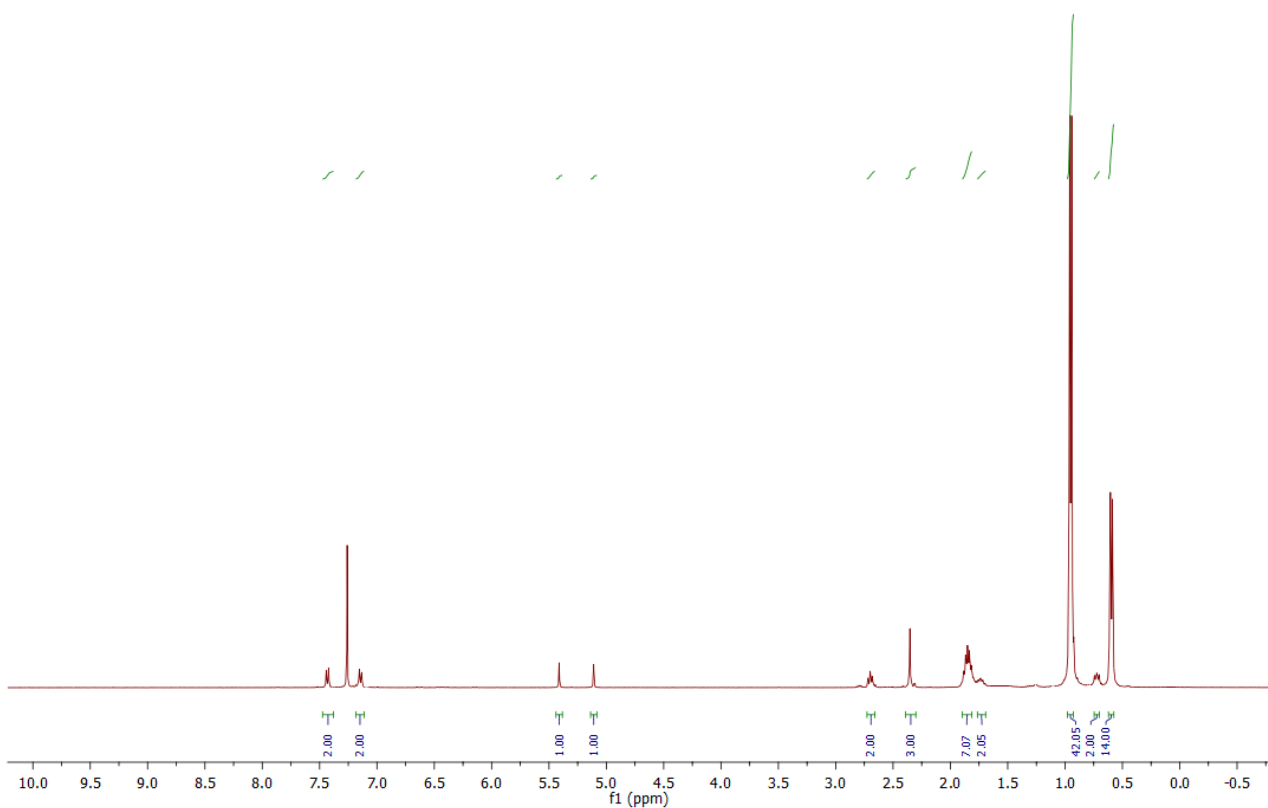

Figure S19. <sup>1</sup>H NMR (400 MHz, CDCl<sub>3</sub>) of product P3

Product P3

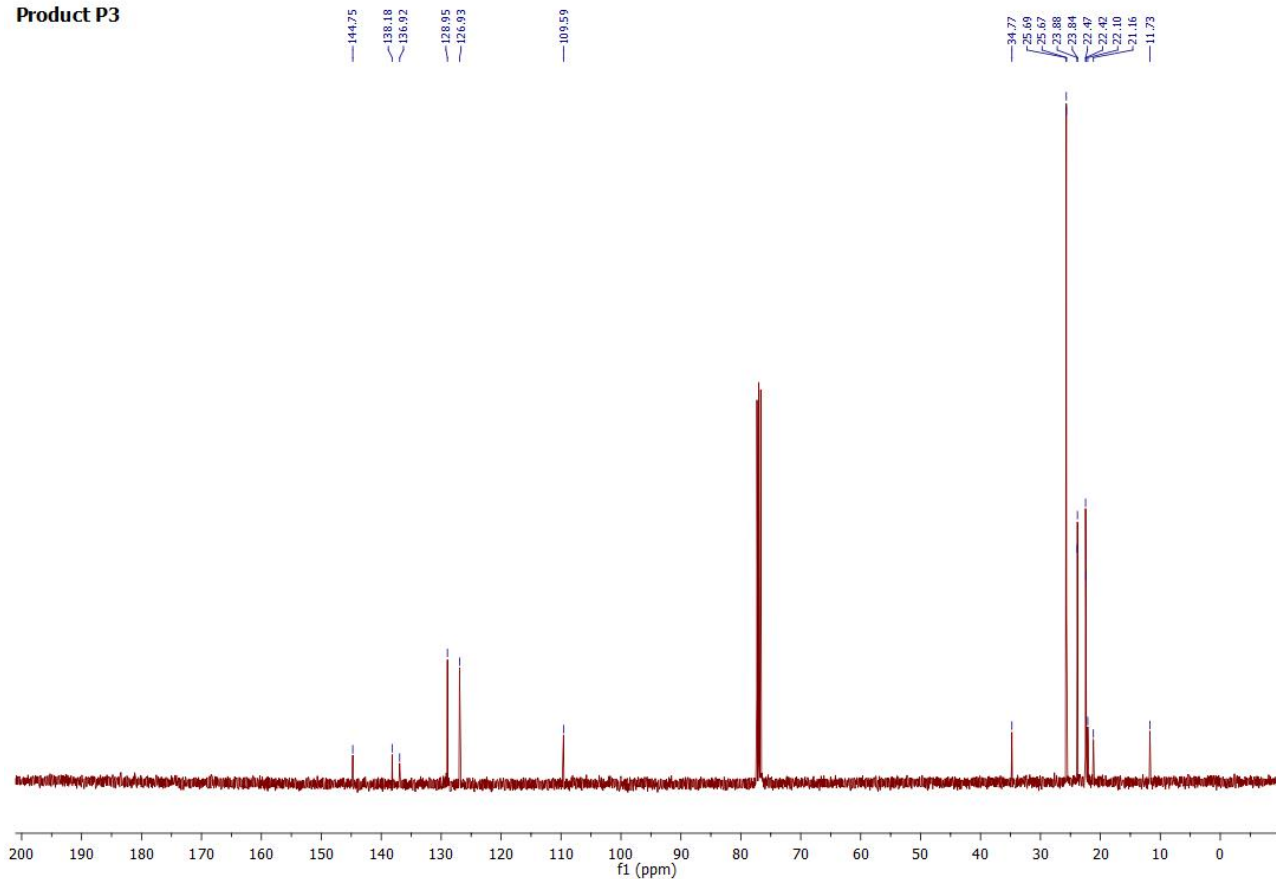

Figure S20. <sup>13</sup>C NMR (101 MHz, CDCl<sub>3</sub>) of product P3

Product P3

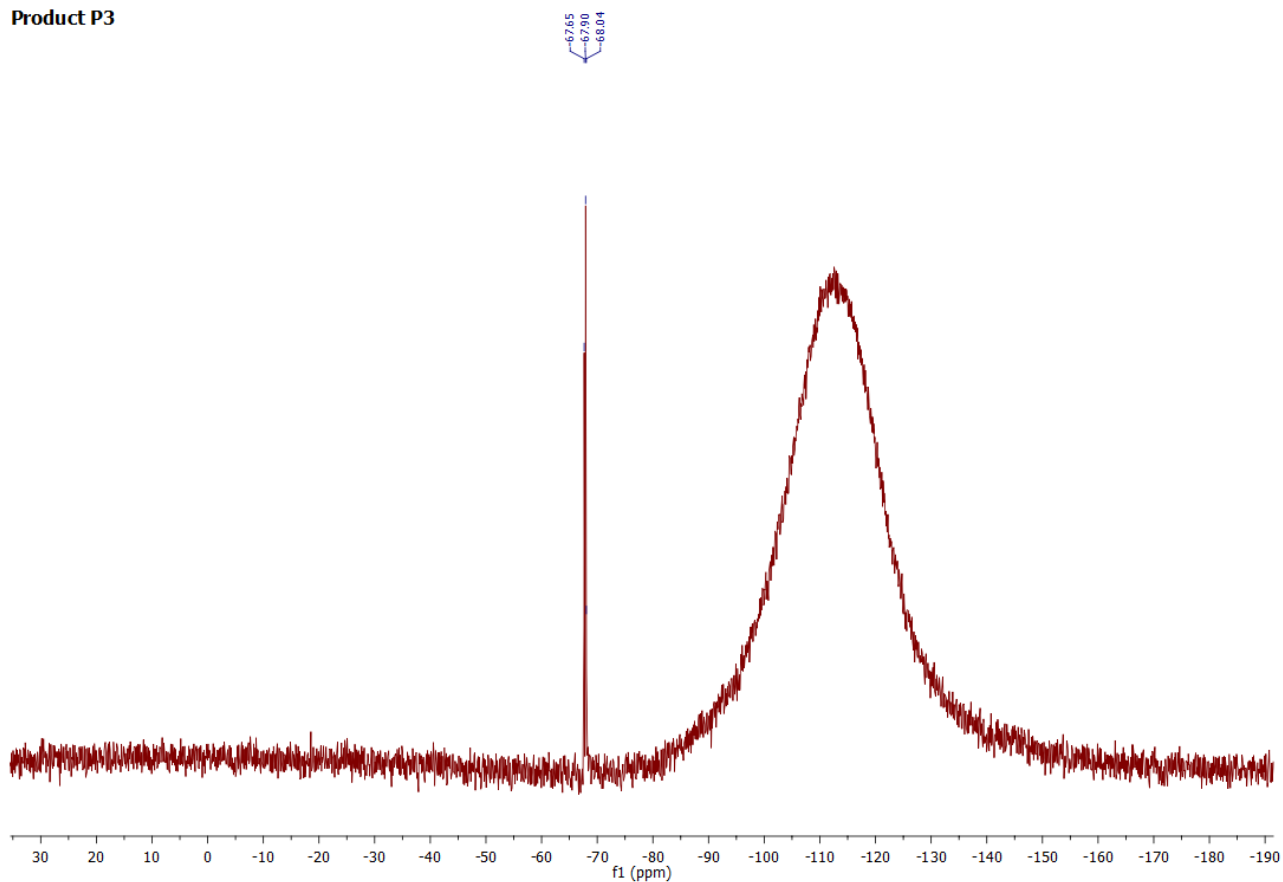

Figure S21.  $^{29}\text{Si}$  NMR (79 MHz,  $\text{CDCl}_3$ ) of product P3

Product P4

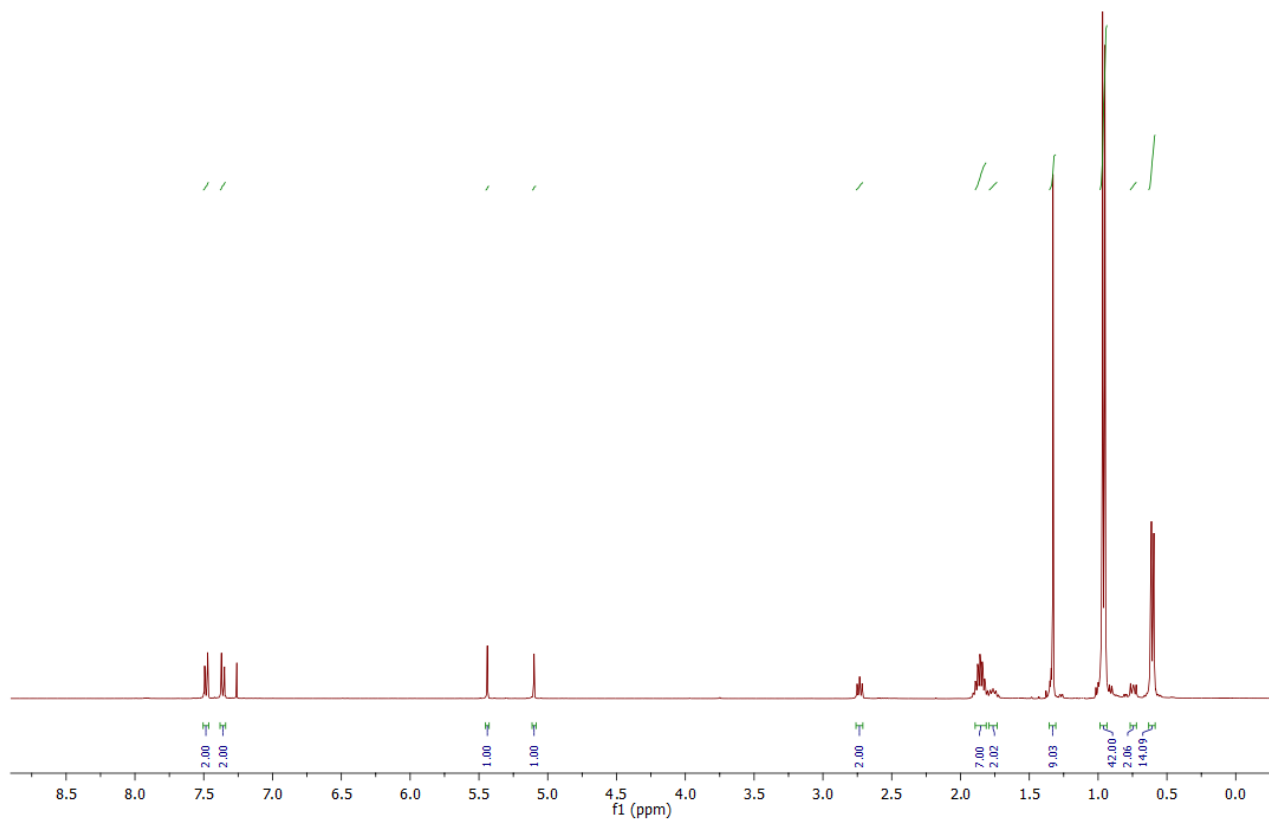

Figure S22.  $^1\text{H}$  NMR (400 MHz,  $\text{CDCl}_3$ ) of product P4



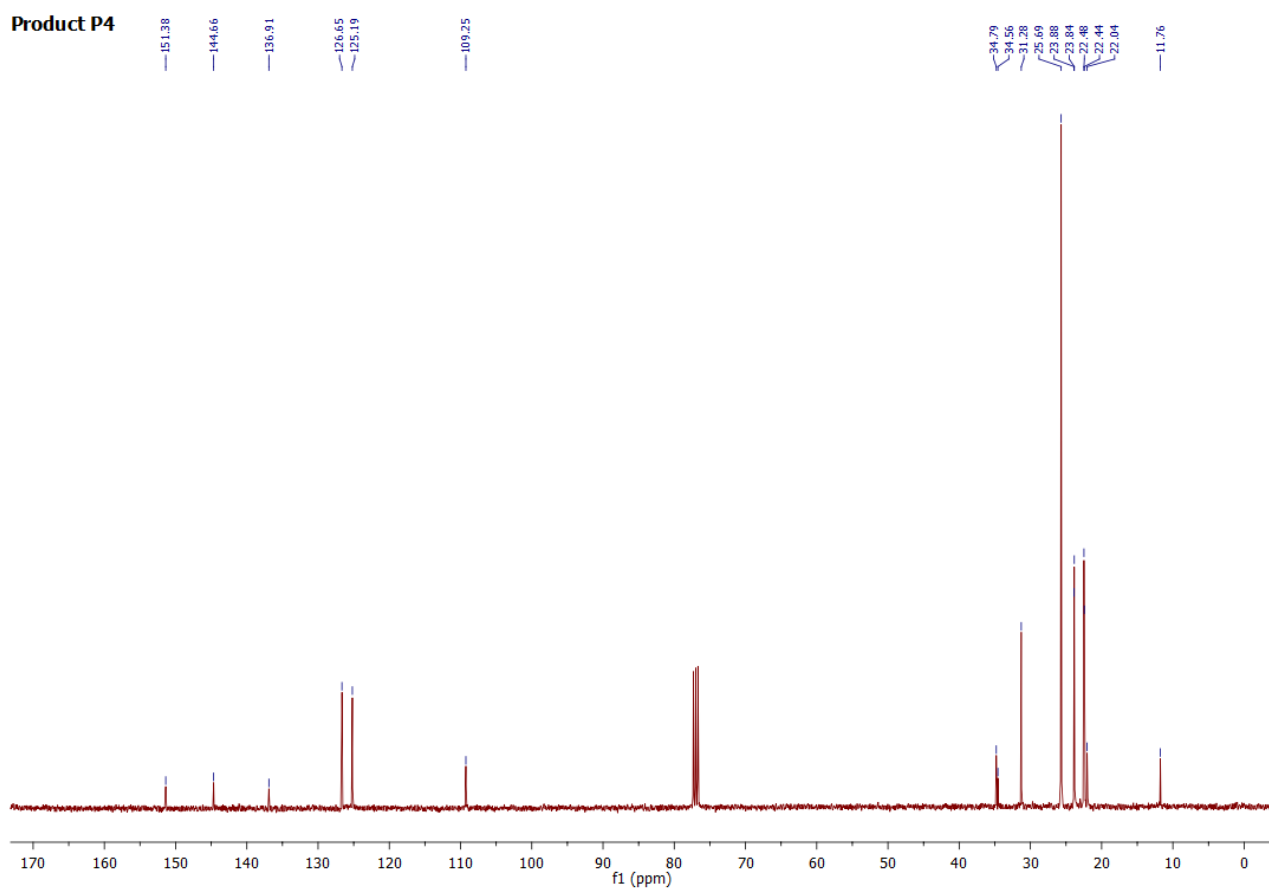

Figure S23.  $^{13}\text{C}$  NMR (101 MHz,  $\text{CDCl}_3$ ) of product **P4**

**Product P4**

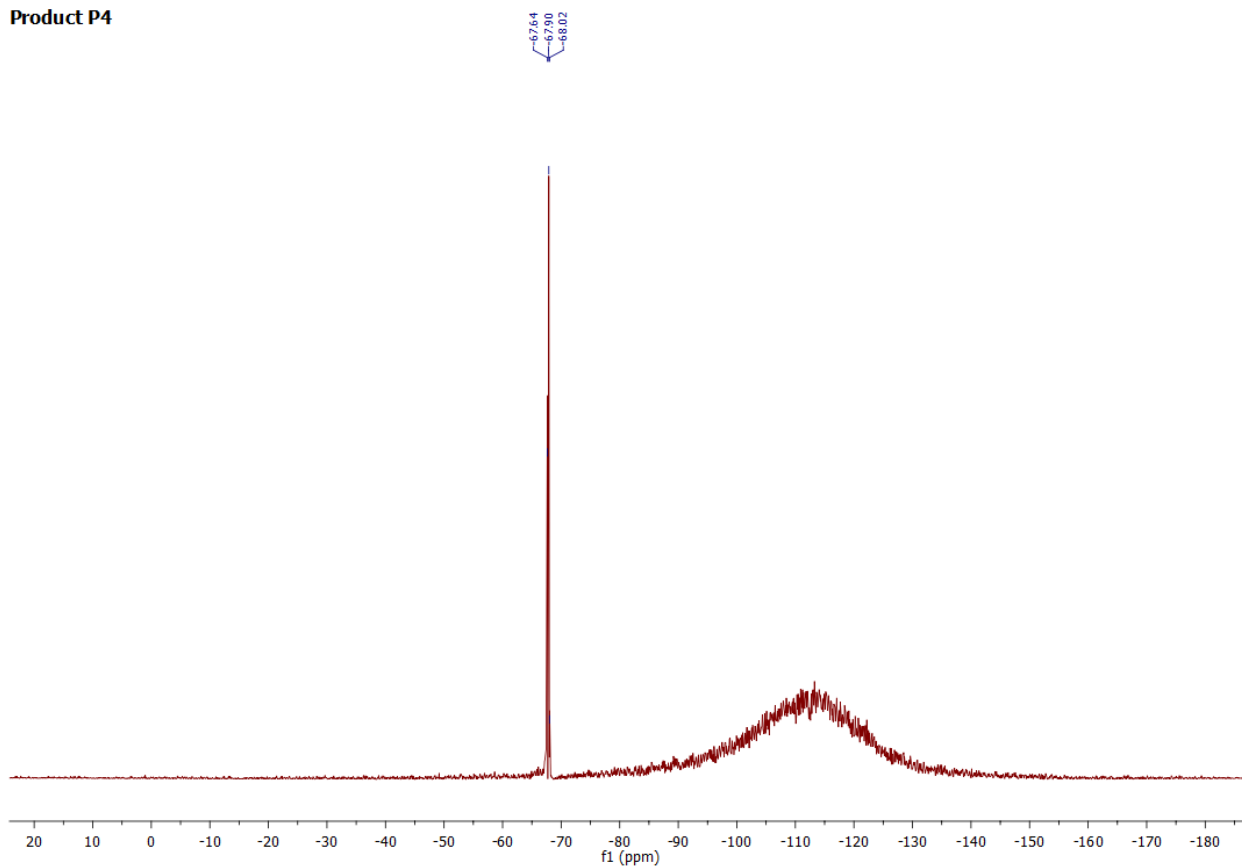

Figure S24.  $^{29}\text{Si}$  NMR (79 MHz,  $\text{CDCl}_3$ ) of product **P4**

Product P5

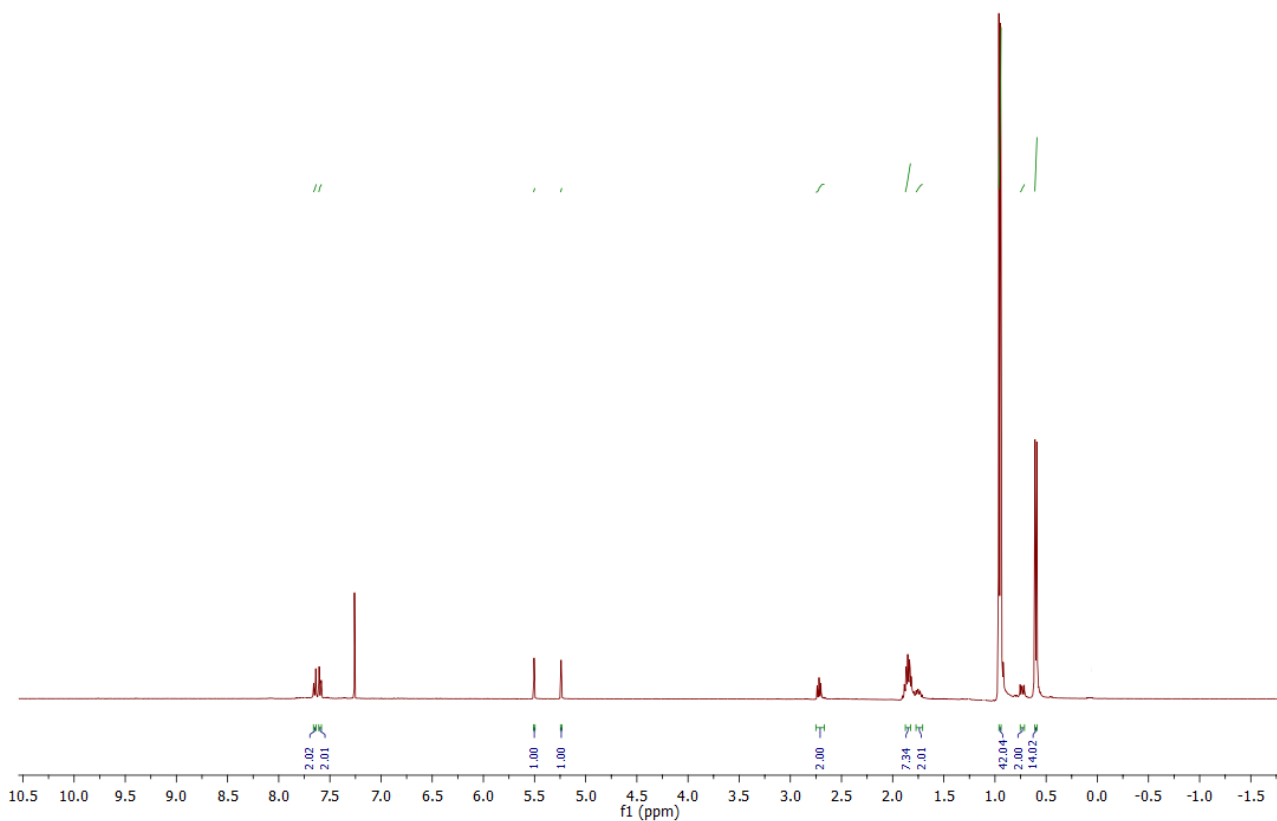

Figure S25. <sup>1</sup>H NMR (400 MHz, CDCl<sub>3</sub>) of product P5

Product P5

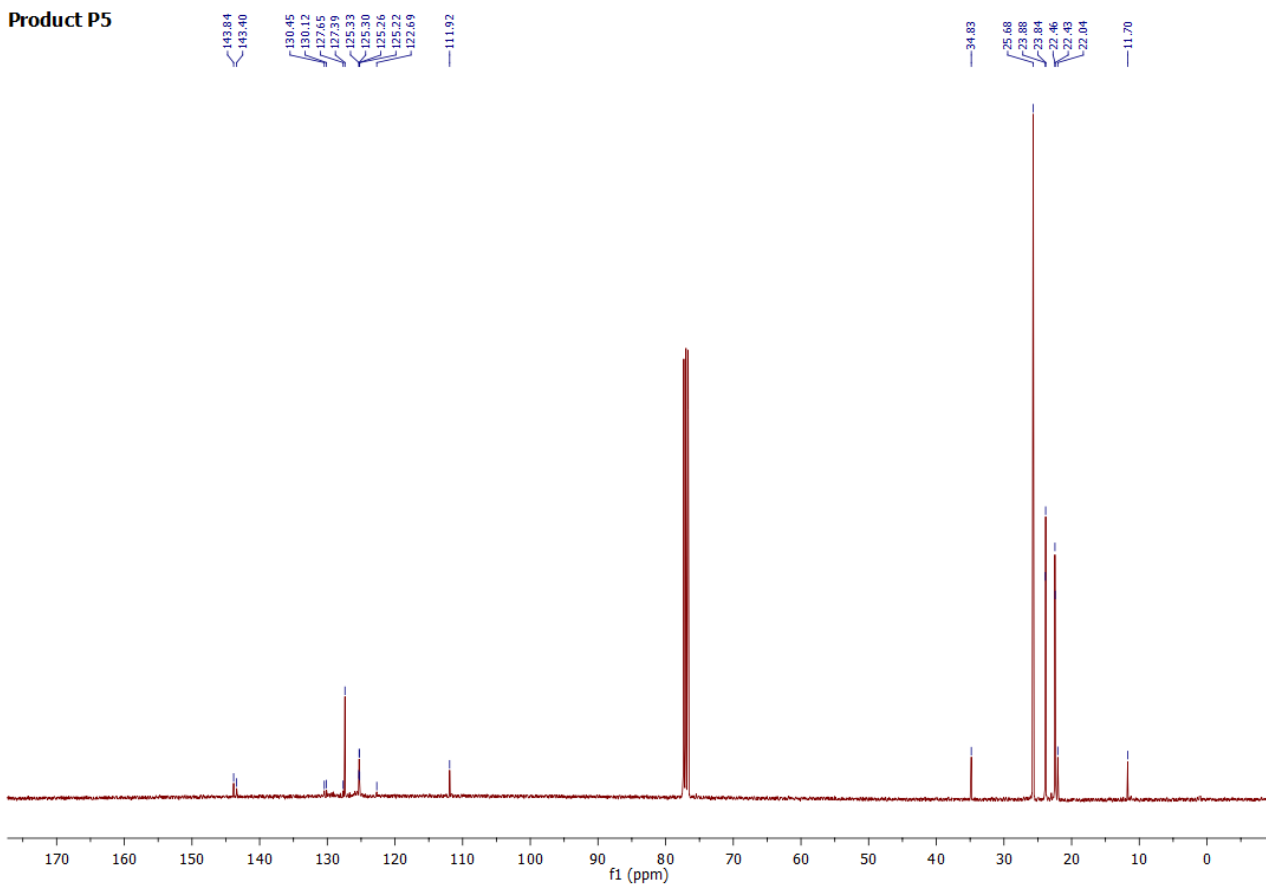

Figure S26. <sup>13</sup>C NMR (101 MHz, CDCl<sub>3</sub>) of product P5

Product P5

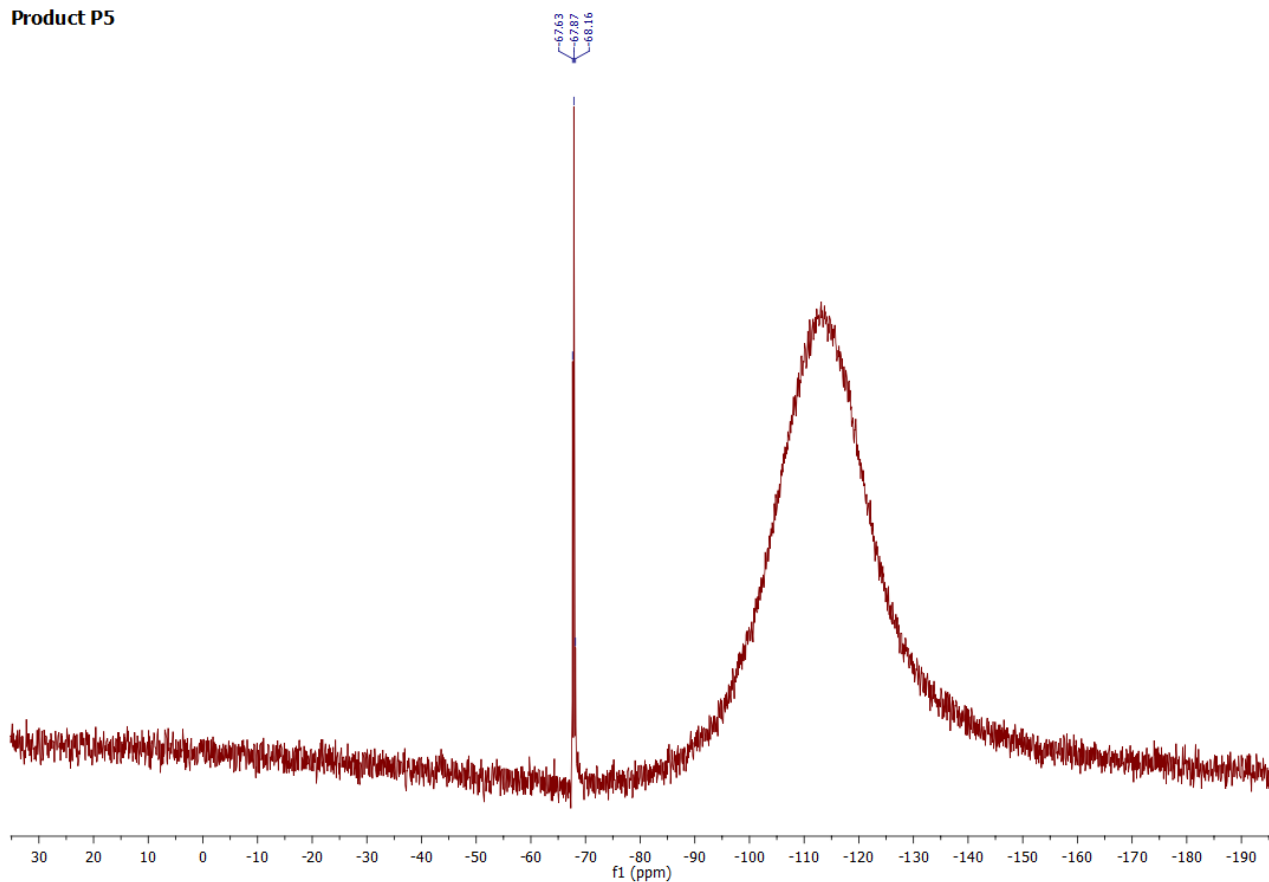

Figure S27.  $^{29}\text{Si}$  NMR (79 MHz,  $\text{CDCl}_3$ ) of product P5

Product P6

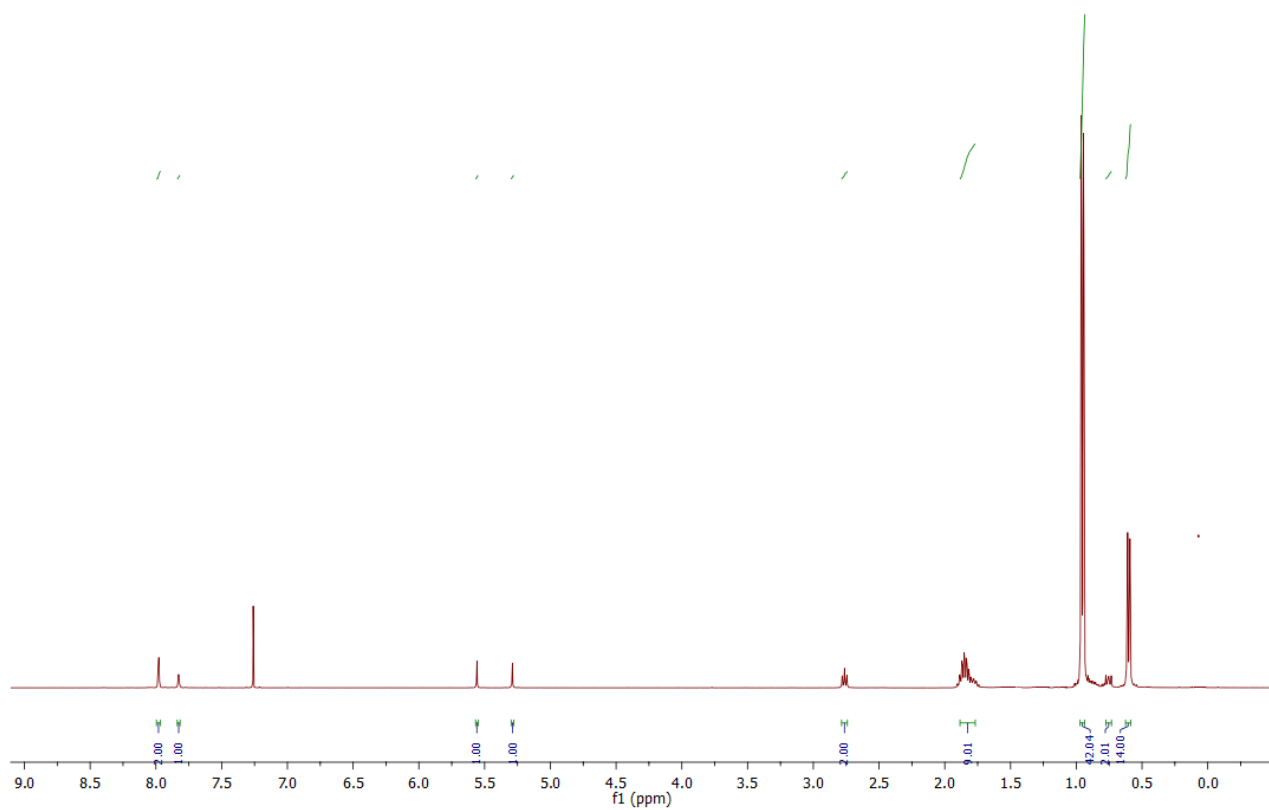

Figure S28.  $^1\text{H}$  NMR (400 MHz,  $\text{CDCl}_3$ ) of product P6

Product P6

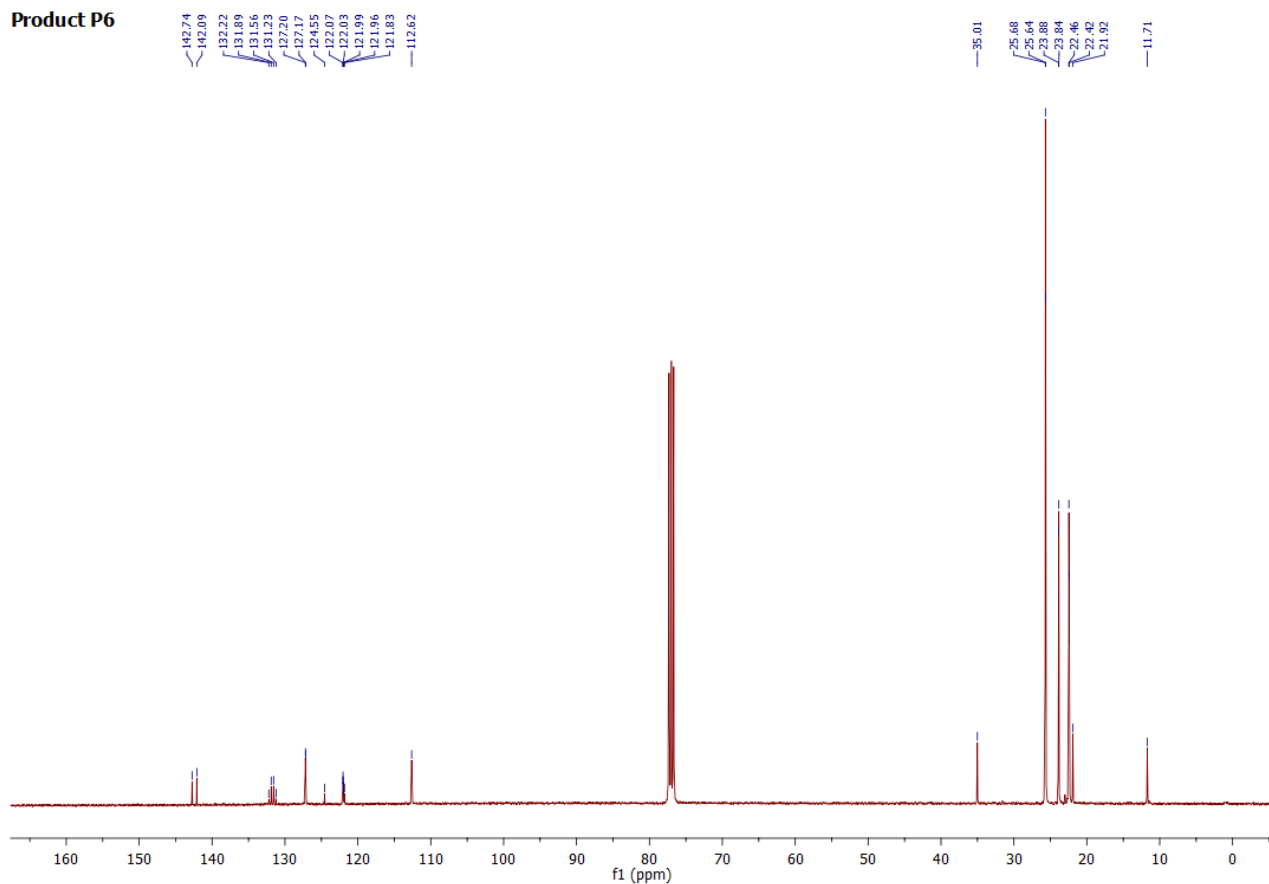

Figure S29. <sup>13</sup>C NMR (101 MHz, CDCl<sub>3</sub>) of product P6

Product P6

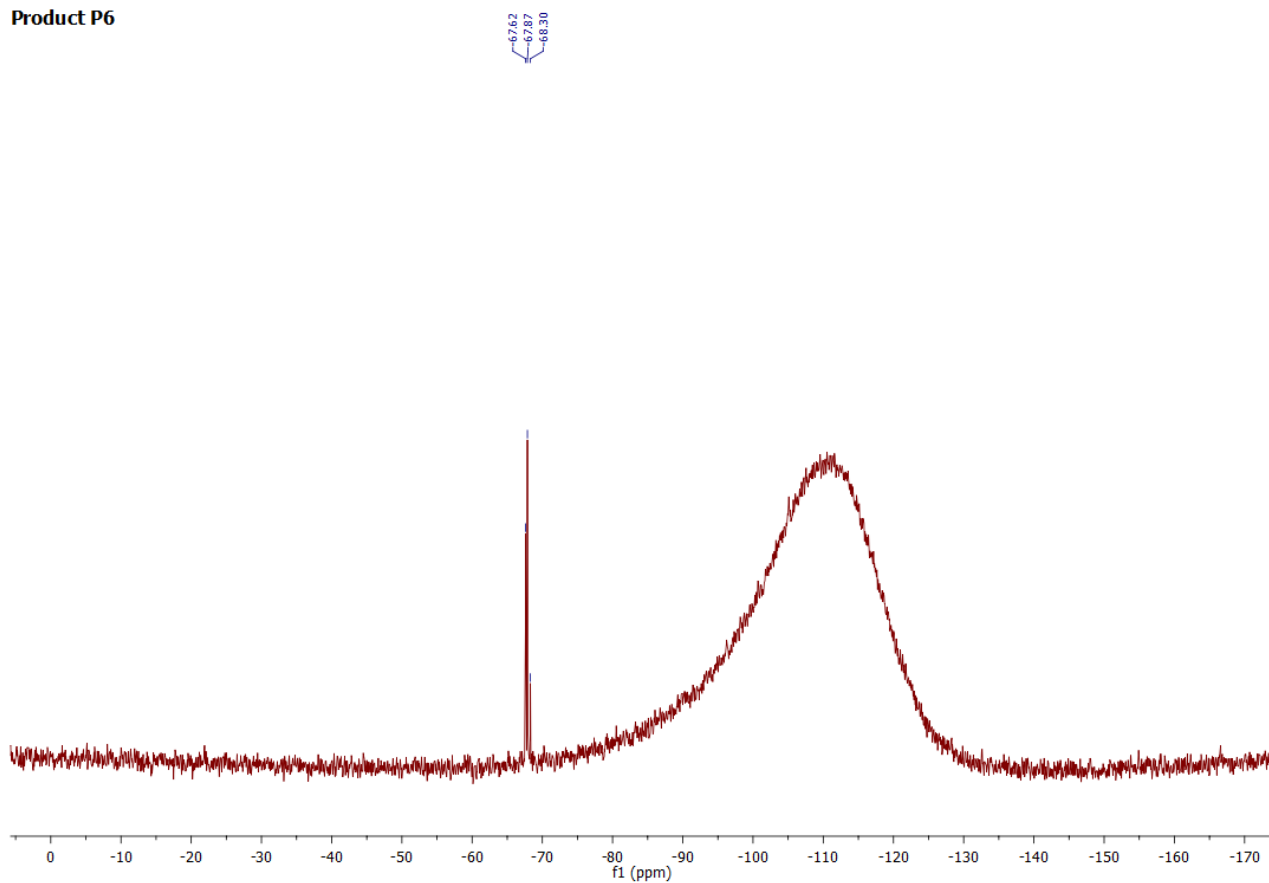

Figure S30. <sup>29</sup>Si NMR (79 MHz, CDCl<sub>3</sub>) of product P6

Product P7

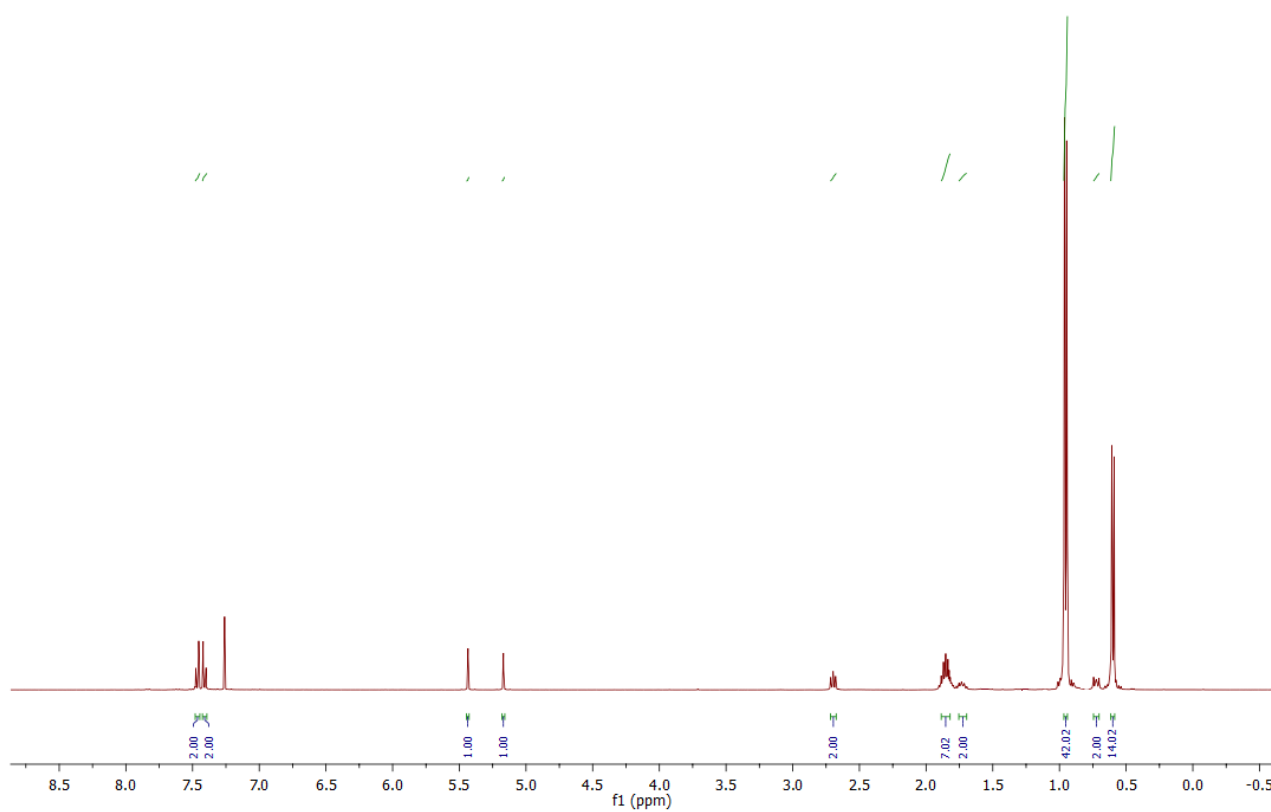

Figure S31.  $^1\text{H}$  NMR (400 MHz,  $\text{CDCl}_3$ ) of product **P7**

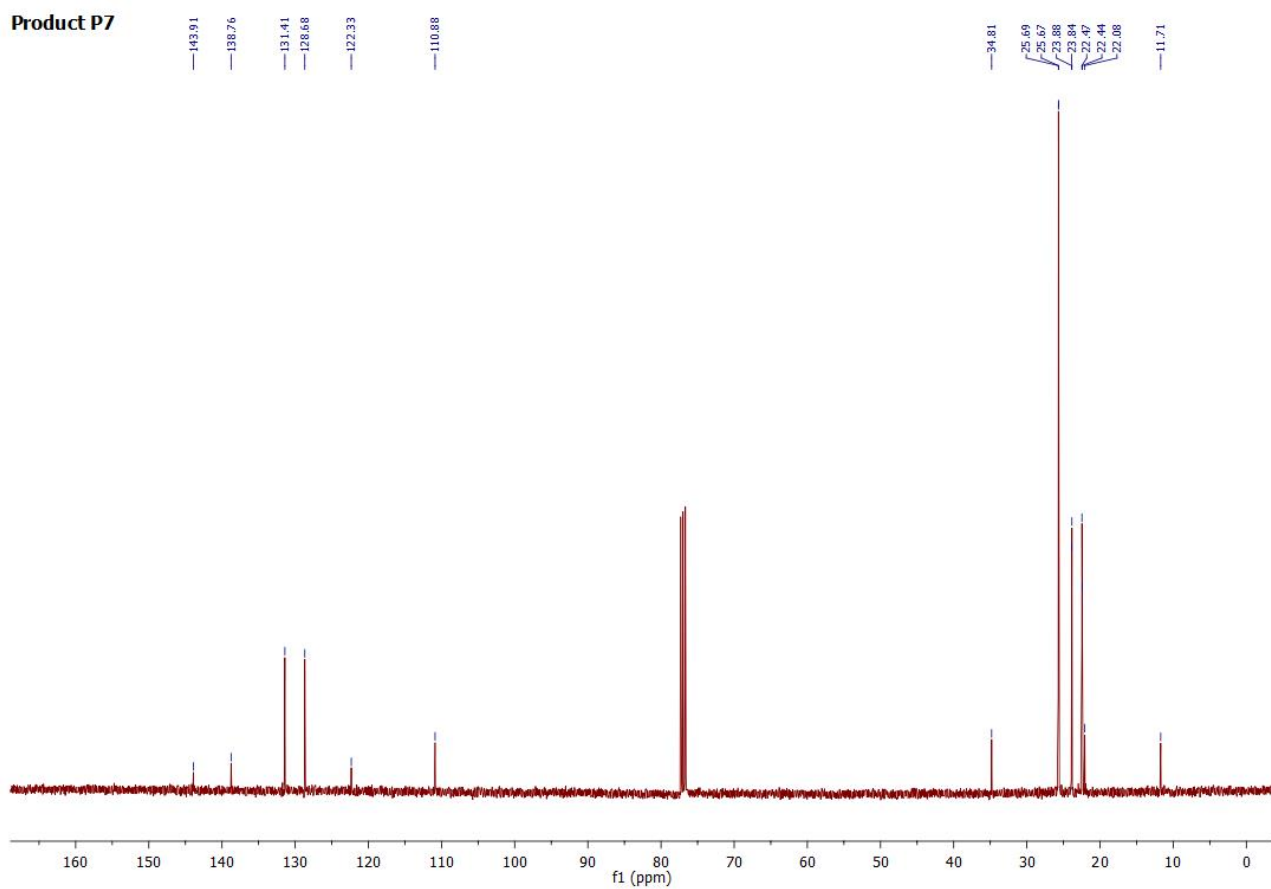

Figure S32.  $^{13}\text{C}$  NMR (101 MHz,  $\text{CDCl}_3$ ) of product **P7**

Product P7

67.64  
67.88  
68.12

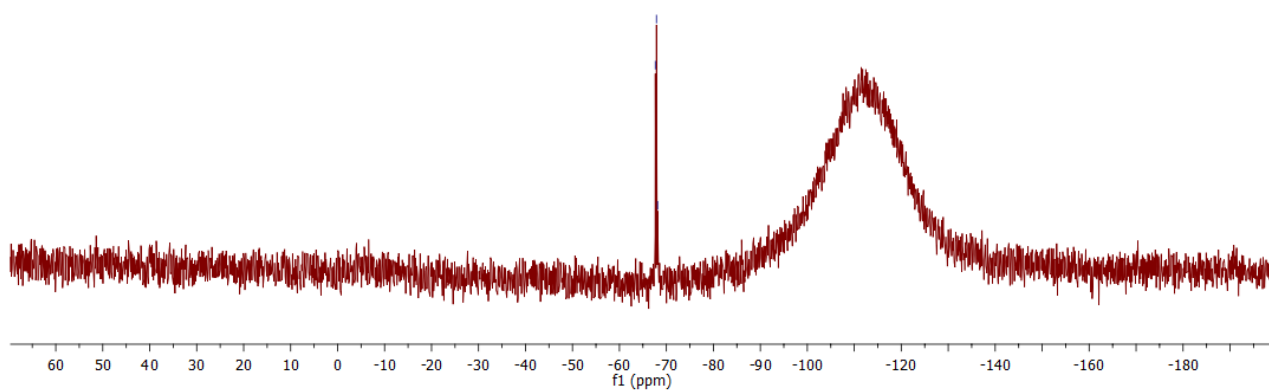

Figure S33.  $^{29}\text{Si}$  NMR (79 MHz,  $\text{CDCl}_3$ ) of product P7

Product P8

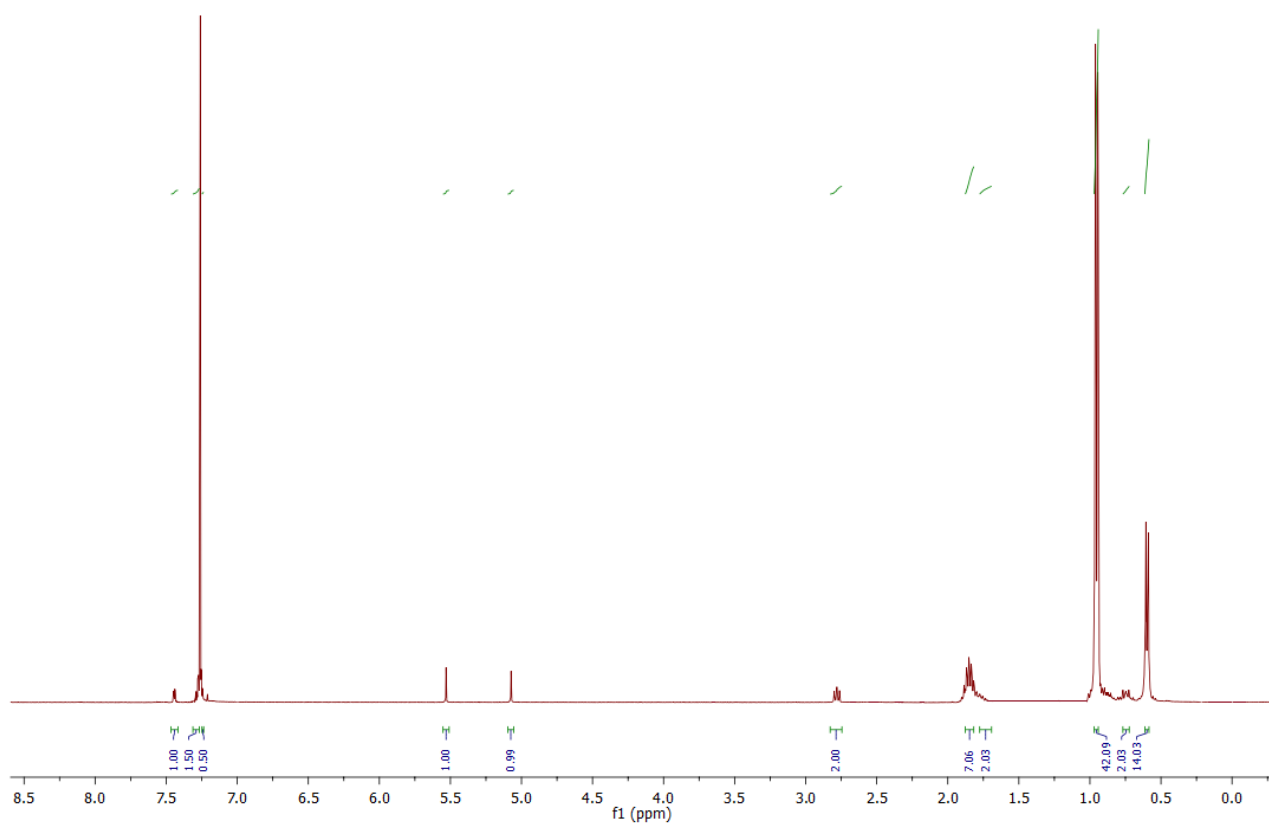

Figure S34.  $^1\text{H}$  NMR (400 MHz,  $\text{CDCl}_3$ ) of product P8

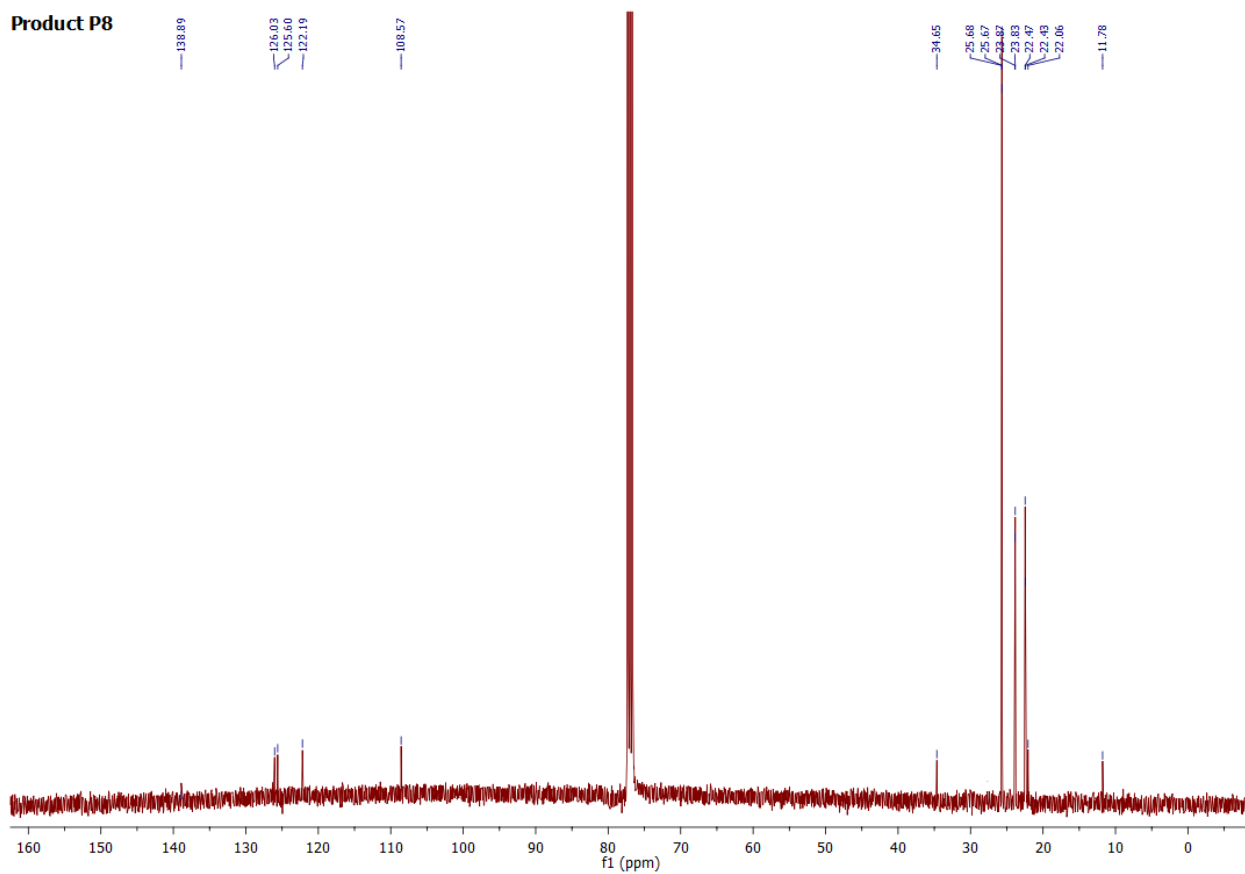

Figure S35.  $^{13}\text{C}$  NMR (101 MHz,  $\text{CDCl}_3$ ) of product **P8**

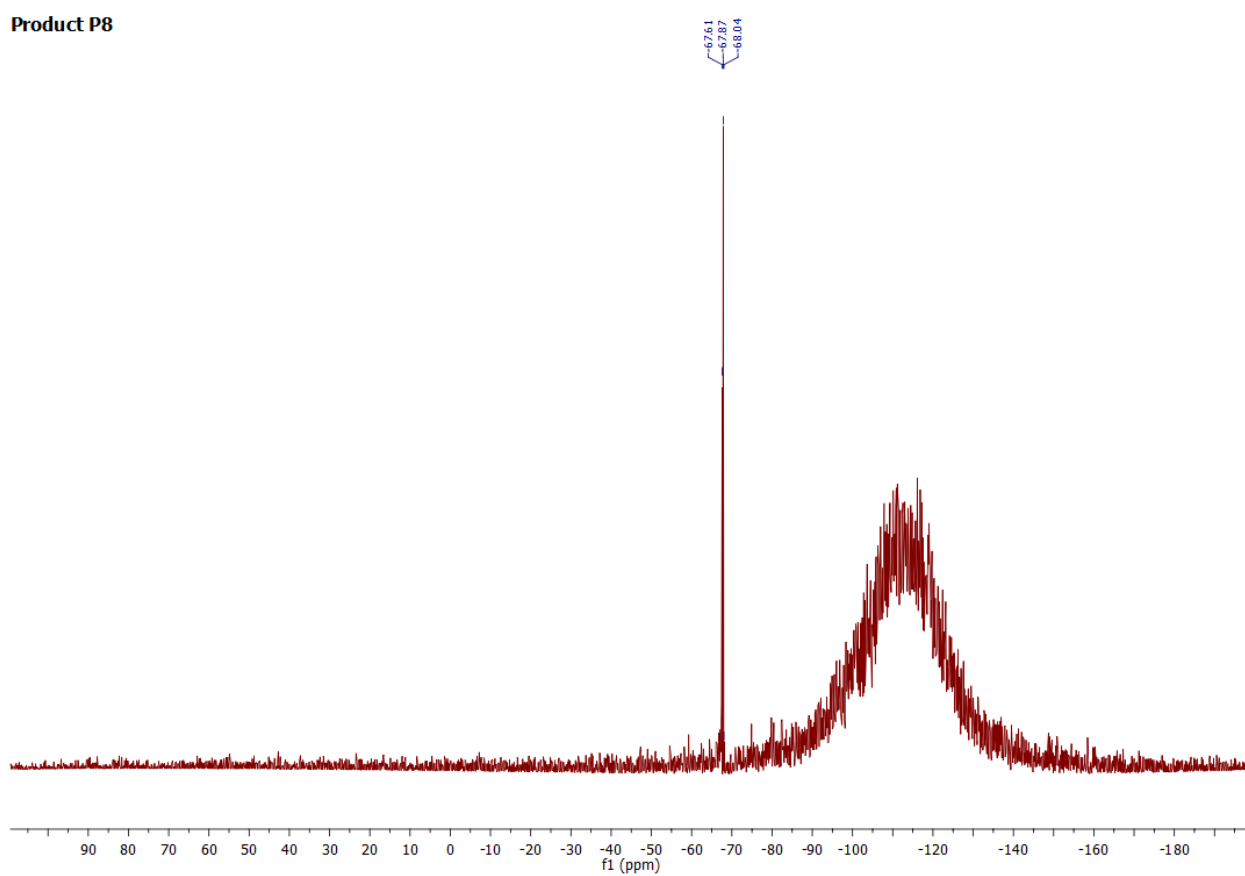

Figure S36.  $^{29}\text{Si}$  NMR (79 MHz,  $\text{CDCl}_3$ ) of product **P8**

Product P9

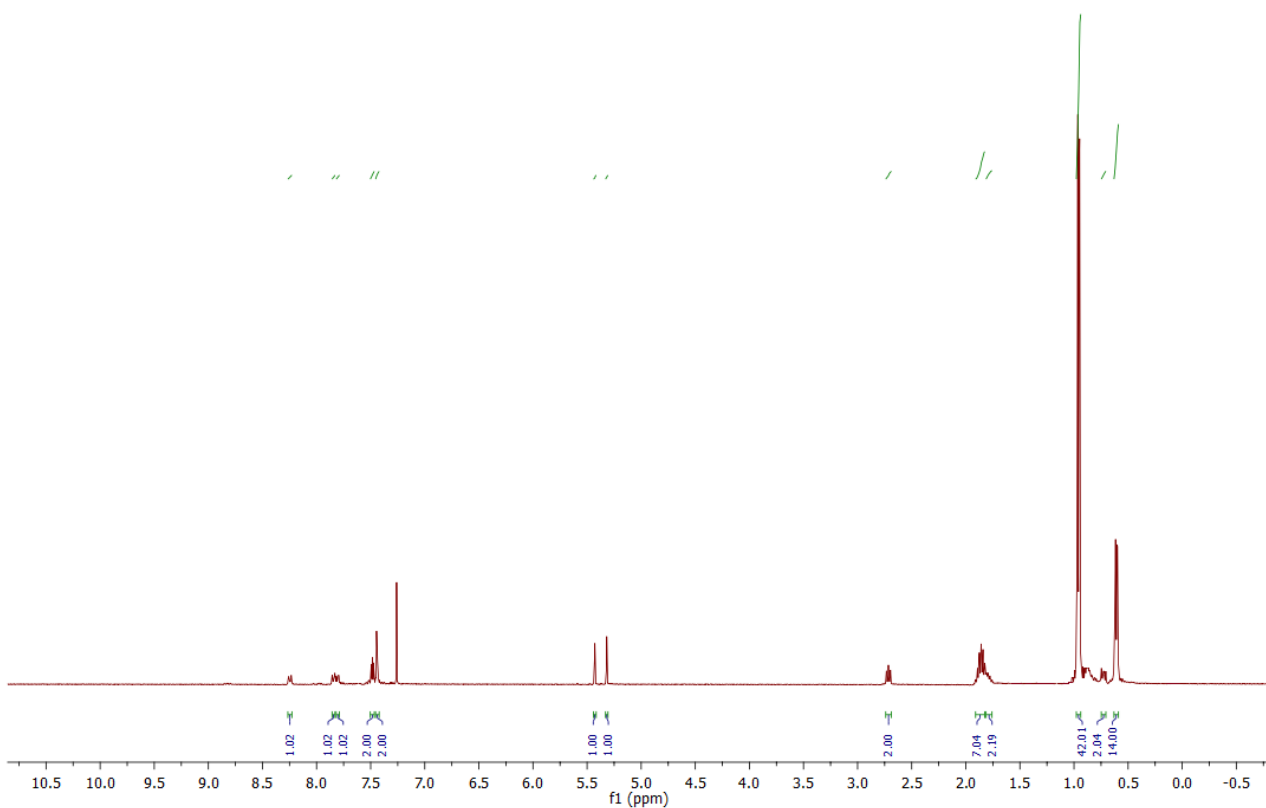

Figure S37. <sup>1</sup>H NMR (400 MHz, CDCl<sub>3</sub>) of product P9

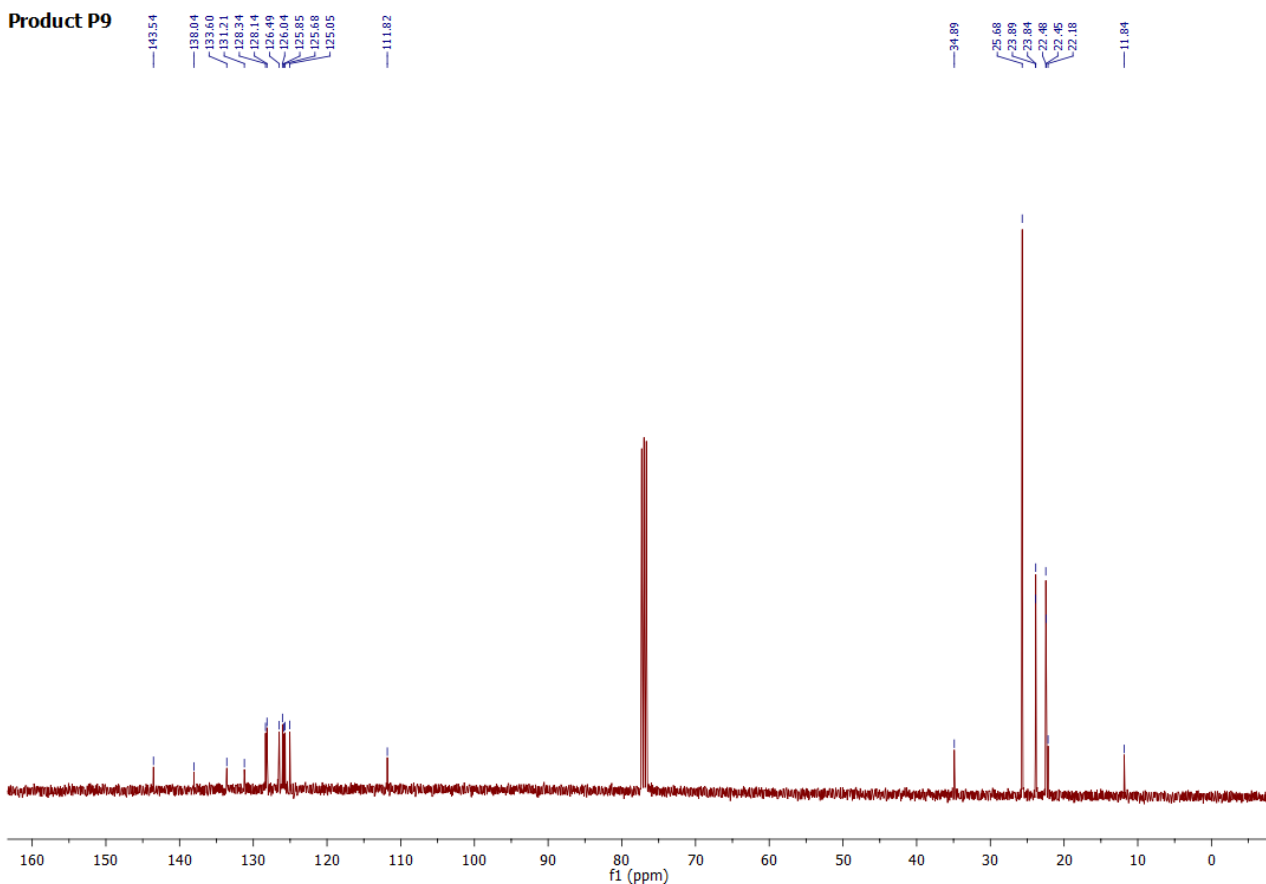

Figure S38. <sup>13</sup>C NMR (101 MHz, CDCl<sub>3</sub>) of product P9



Product P9

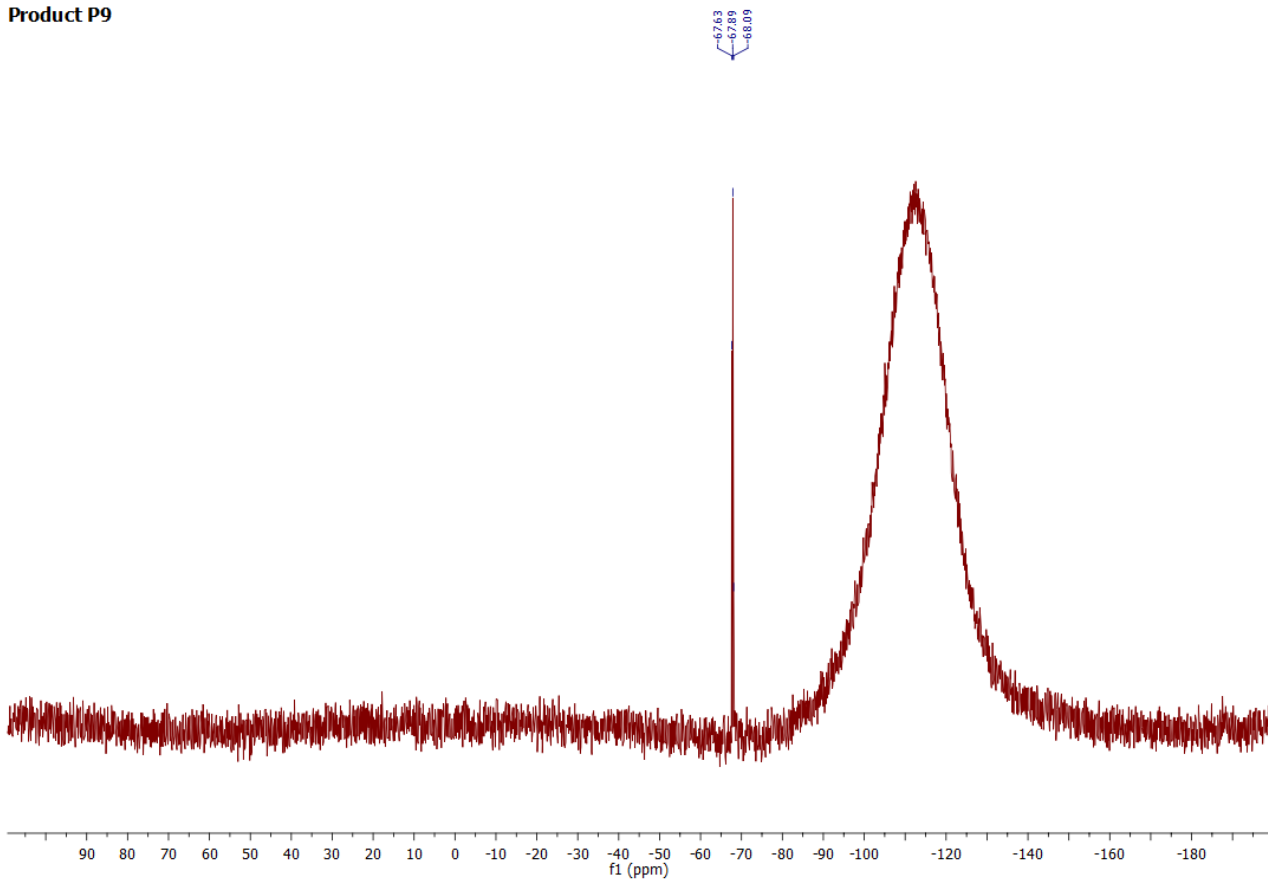

Figure S39.  $^{29}\text{Si}$  NMR (79 MHz,  $\text{CDCl}_3$ ) of product P9

Product P10

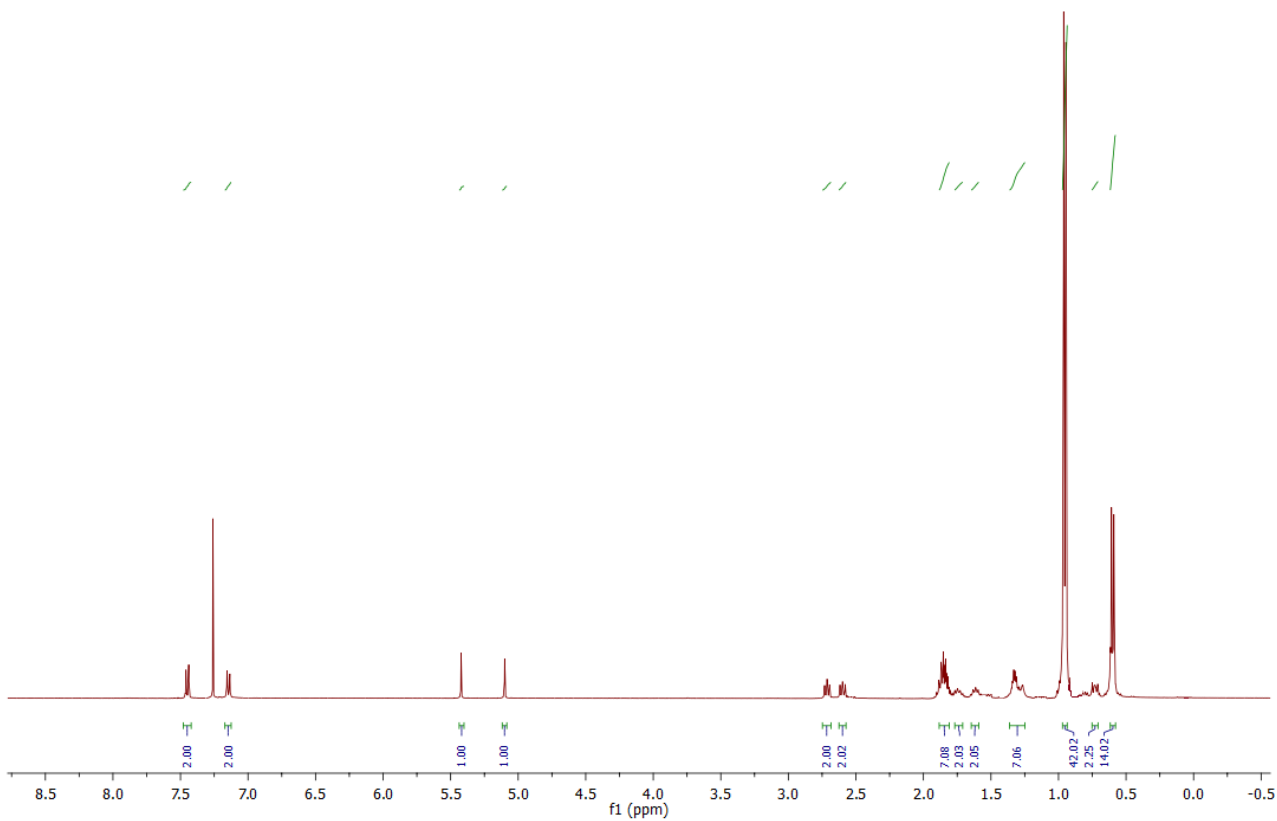

Figure S40.  $^1\text{H}$  NMR (400 MHz,  $\text{CDCl}_3$ ) of product P10

Product P10

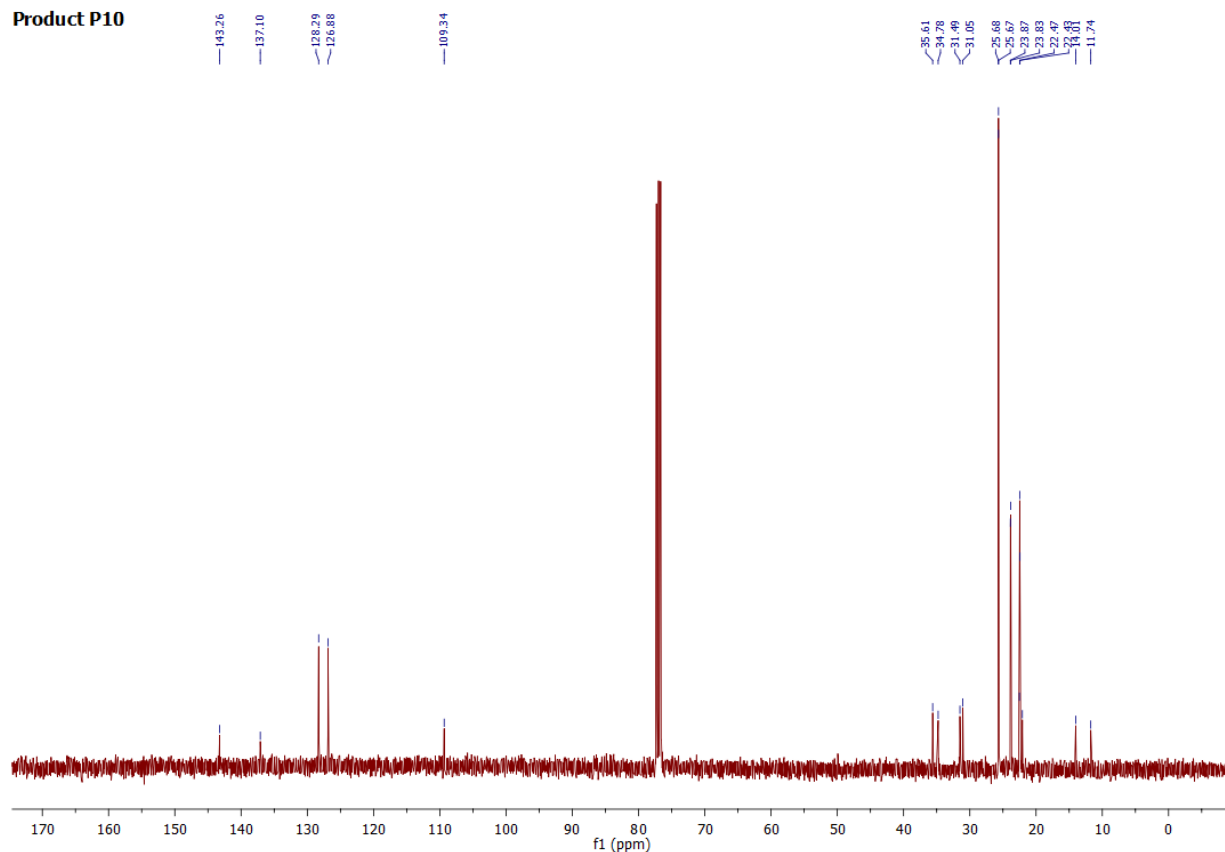

Figure S41. <sup>13</sup>C NMR (101 MHz, CDCl<sub>3</sub>) of product P10

Product P10

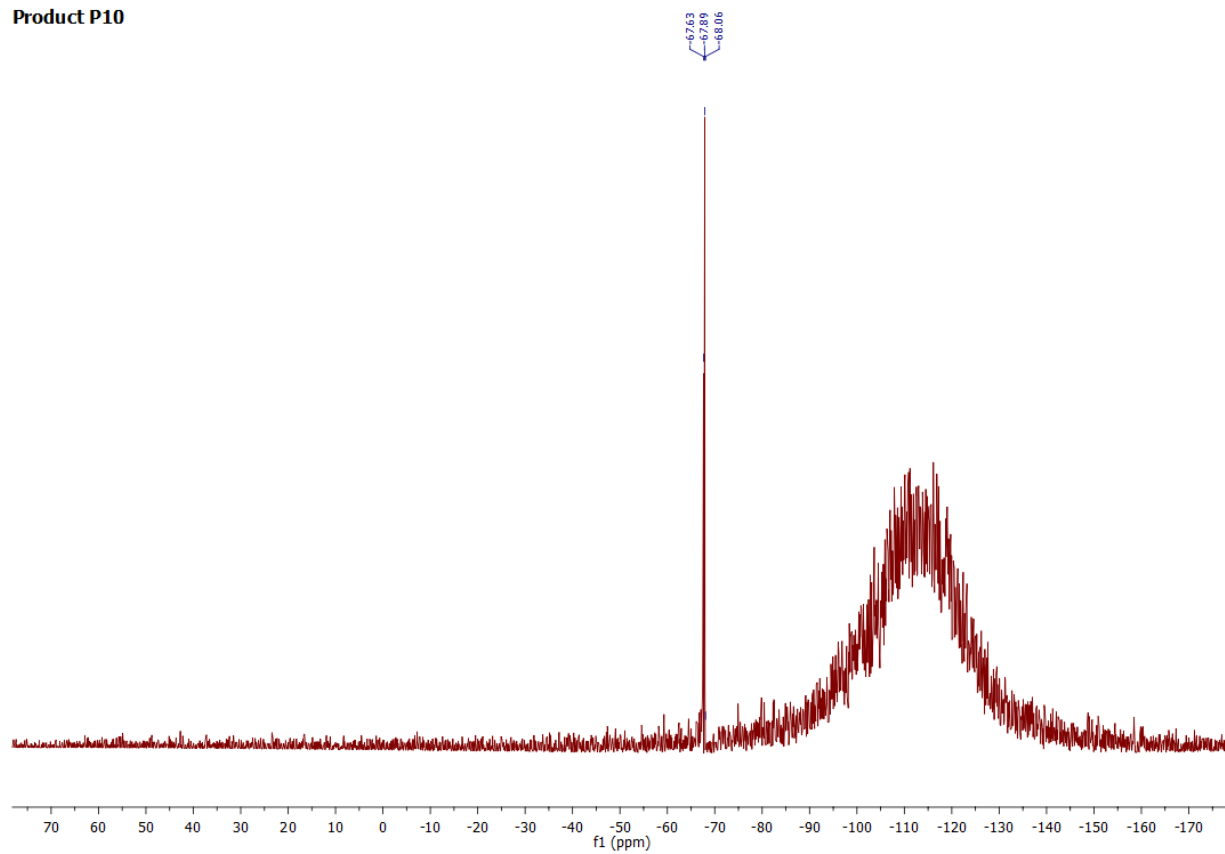

Figure S42. <sup>29</sup>Si NMR (79 MHz, CDCl<sub>3</sub>) of product P10

Product P11

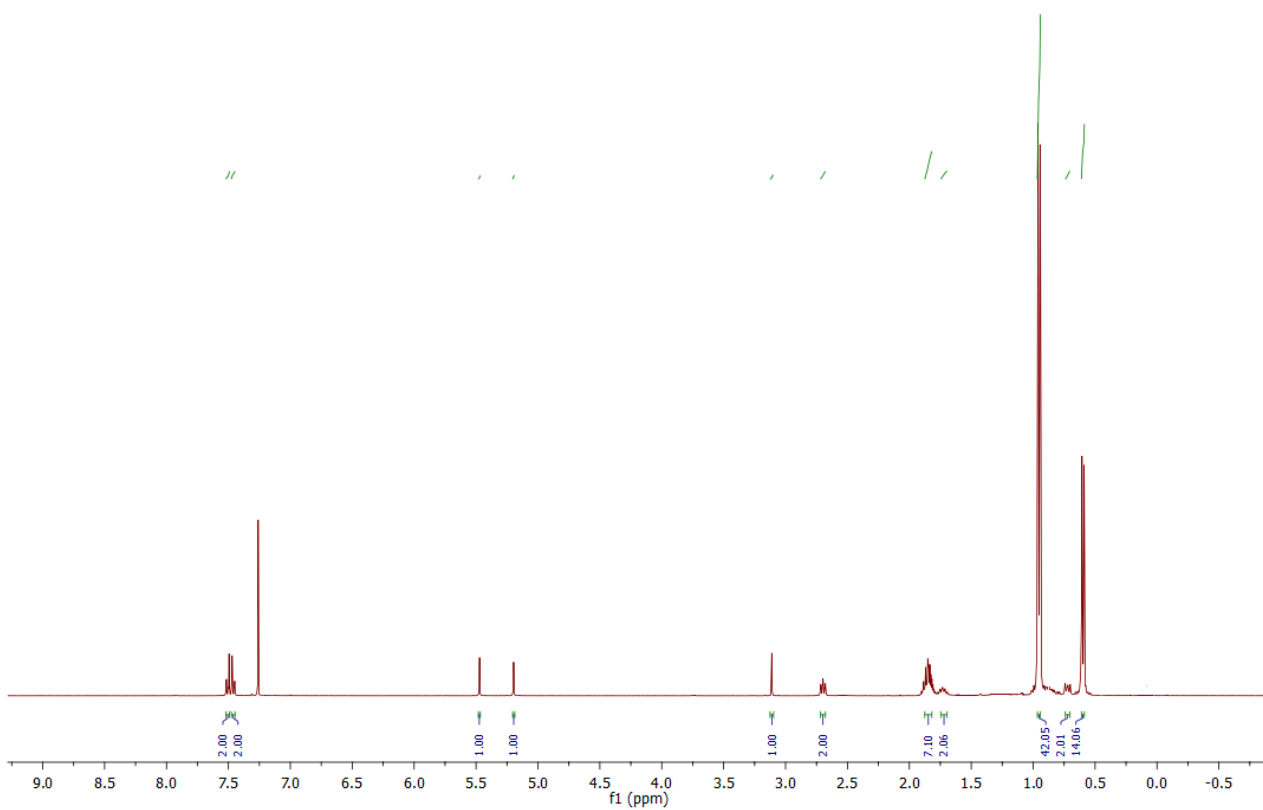

Figure S43. <sup>1</sup>H NMR (400 MHz, CDCl<sub>3</sub>) of product P11

Product P11

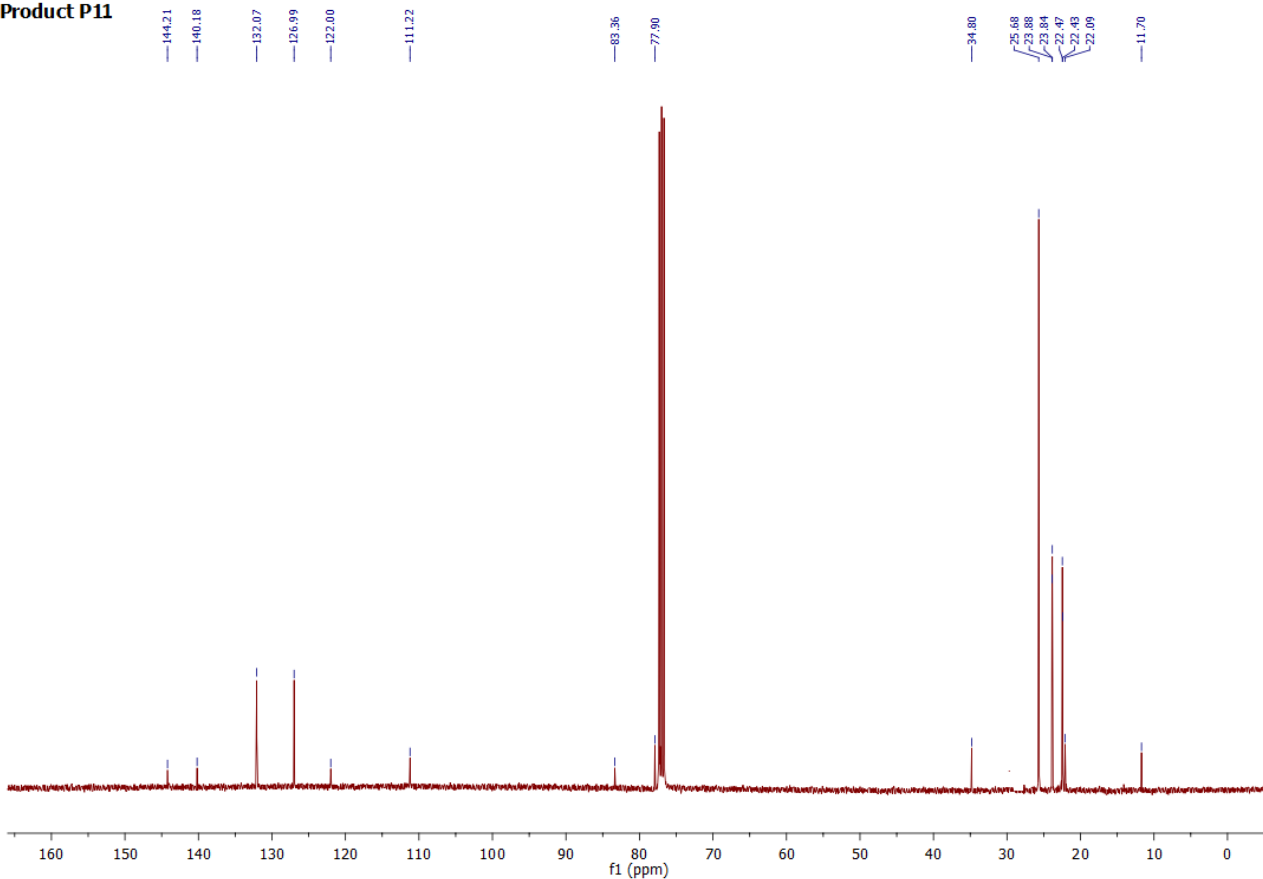

Figure S44. <sup>13</sup>C NMR (101 MHz, CDCl<sub>3</sub>) of product P11

Product P11

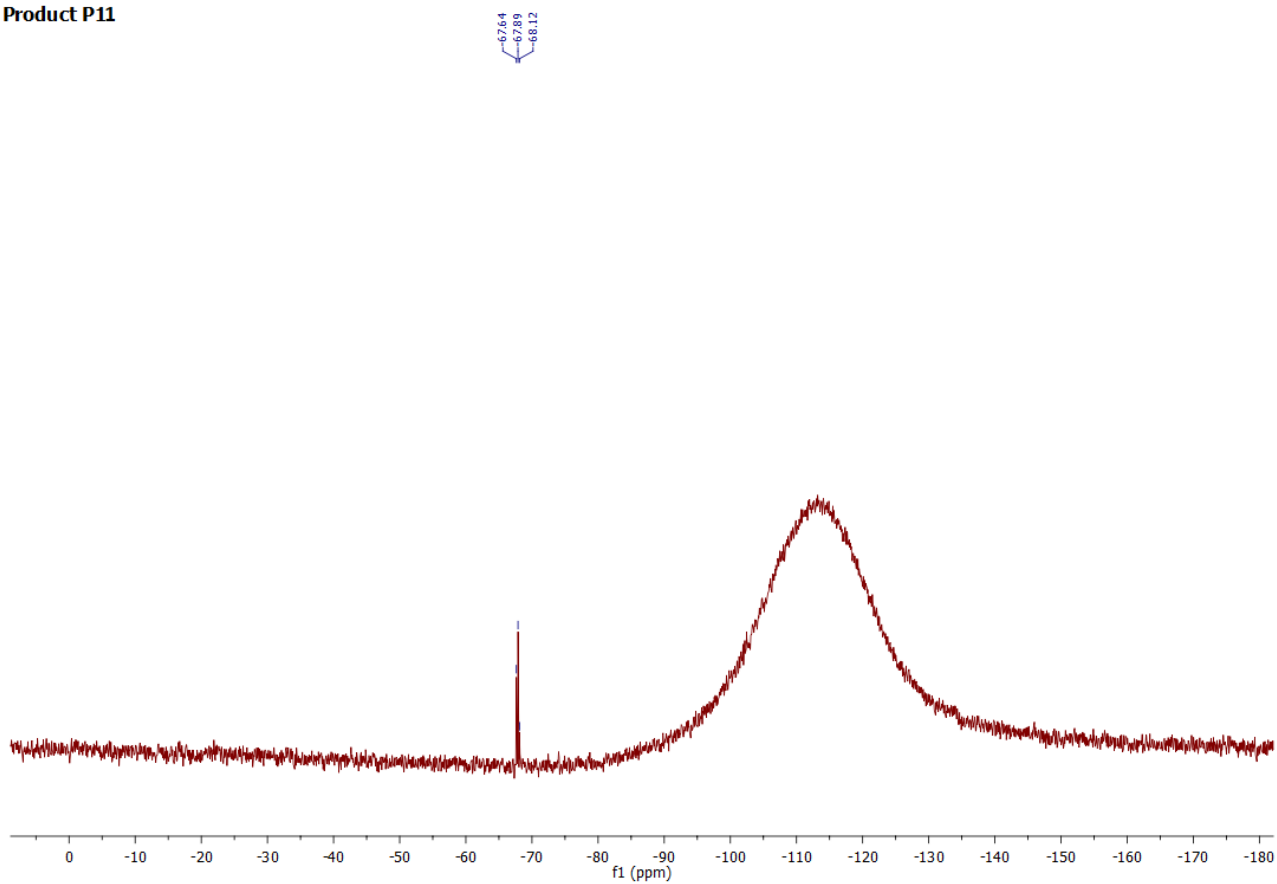

Figure S45.  $^{29}\text{Si}$  NMR (79 MHz,  $\text{CDCl}_3$ ) of product **P11**

Product P12

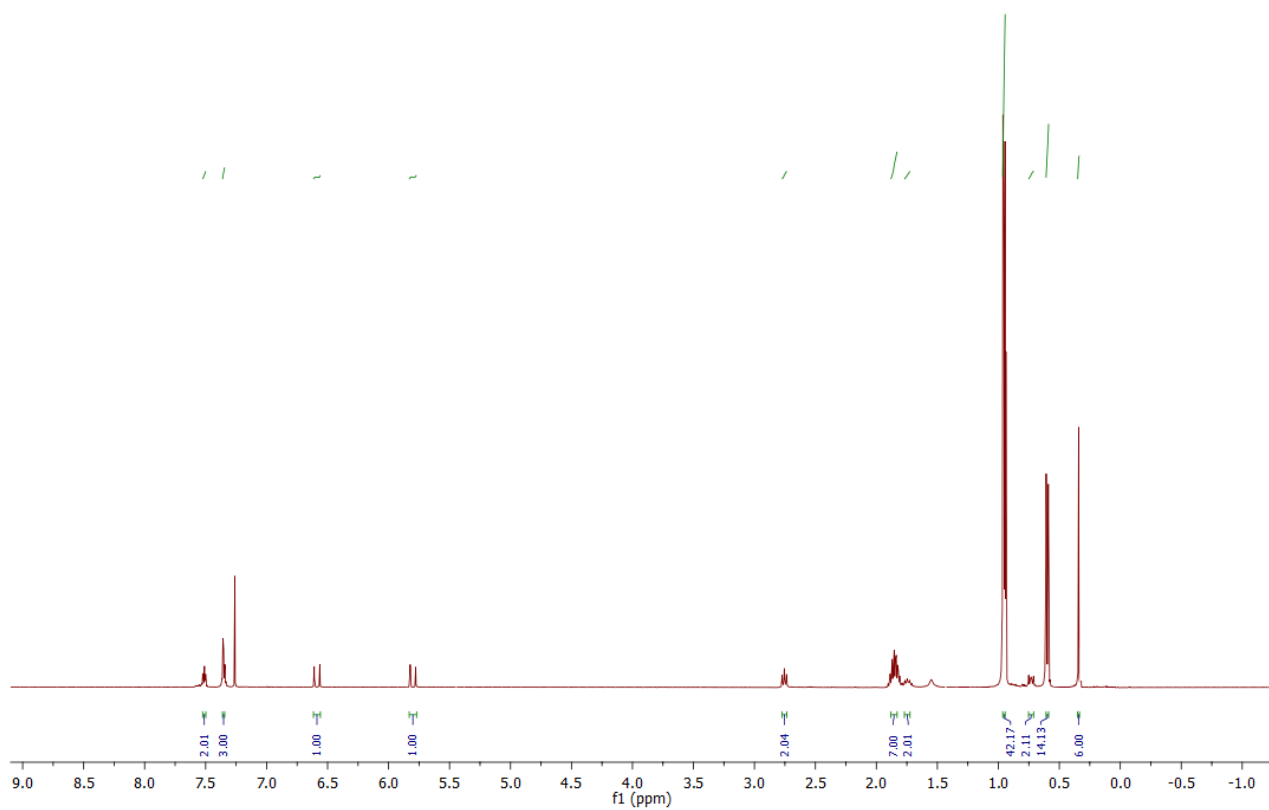

Figure S46.  $^1\text{H}$  NMR (400 MHz,  $\text{CDCl}_3$ ) of product **P12**

Product P12

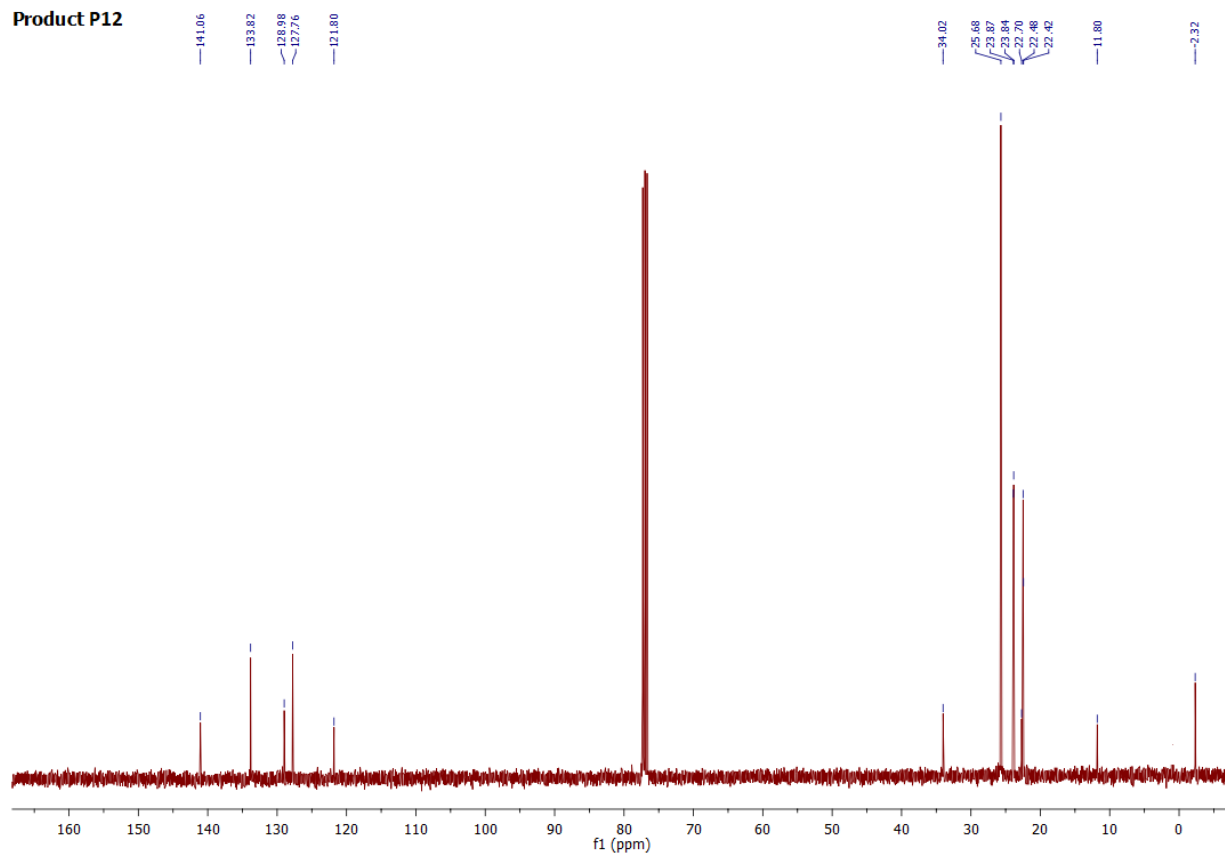

Figure S47. <sup>13</sup>C NMR (101 MHz, CDCl<sub>3</sub>) of product P12

Product P12

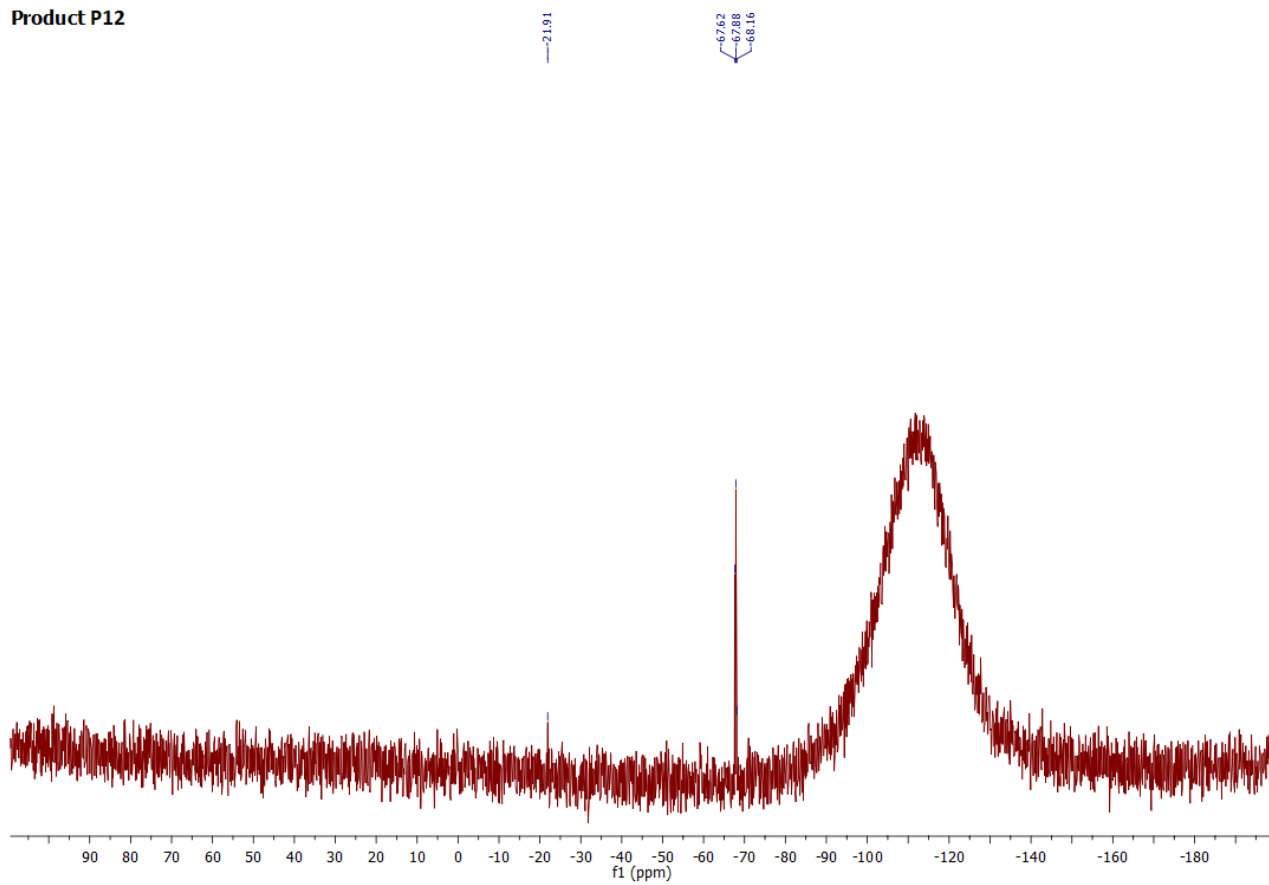

Figure S48. <sup>29</sup>Si NMR (79 MHz, CDCl<sub>3</sub>) of product P12
